# Supplementary material for: Discovery of Novel Potential Aphid Repellents: Geranic Acid Esters Containing Substituted Aromatic Rings
Source: MDPI journal article supplement (doi:10.3390/molecules27185949), 2022-09-13

# Supporting information

**Discovery of Novel Potential Aphid Repellents: **Geranic** Acid Esters**

**Containing Substituted Aromatic Rings**

Shixiang Pan , Wenhao Li , Yaoguo Qin , Zhaokai Yang , Yan Liu , Zhuo Shi ,

Cheng Qu , Chen Luo \* , and Xinling Yang \*

## Contents

|                                                                                                          |    |
|----------------------------------------------------------------------------------------------------------|----|
| 1. Scheme S1. Synthetic route of <b>CAU13</b> .....                                                      | 3  |
| 2. Figure S1. Binding curves and Scatchard plots (insert) of 1-NPN to ApisOBP9 ....                      | 4  |
| 3. Figure S2. Competitive binding curves of compounds to ApisOBP9.....                                   | 4  |
| 4. <sup>1</sup> H NMR and <sup>13</sup> C NMR Spectrums of compounds <b>CAU13</b> and <b>5a-5x</b> ..... | 5  |
| 5. HRMS Spectrums of compounds <b>5a-5x</b> .....                                                        | 30 |

### 1. Scheme S1. Synthetic route of CAU13.

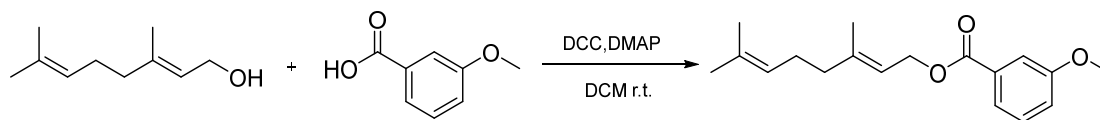

The synthesis of **CAU13** was started by stirring geraniol (5 mmol) with 3-Methoxybenzoic acid (5 mmol) in DCM (30 mL) under ice bath. Then dicyclohexylcarbodiimide (DCC, 6 mmol) and 4-dimethylaminopyridine (DMAP, 0.6 mmol) were added into reaction stirring for 30 minutes. After that removed the ice bath and the mixture was finished by TLC detected after stirring 6 h, washed with saturated aqueous sodium bicarbonate solution for 3 times, extracted with DCM, dried with anhydrous sodium sulfate, and filtered. The organic phase was concentrated under reduced pressure and purified by column chromatography to obtain it as colorless liquid, 90.1% yield. <sup>1</sup>H NMR (500 MHz, Chloroform-*d*) δ 7.64 (dd, *J* = 7.6, 1.3 Hz, 1H), 7.57 (t, *J* = 2.0 Hz, 1H), 7.33 (t, *J* = 8.0 Hz, 1H), 7.09 (dd, *J* = 8.2, 2.7 Hz, 1H), 5.47 (tt, *J* = 7.1, 1.4 Hz, 1H), 5.12 – 5.08 (m, 1H), 4.84 (d, *J* = 7.0 Hz, 2H), 3.85 (s, 3H), 2.14 – 2.06 (m, 4H), 1.77 (s, 3H), 1.68 (s, 3H), 1.60 (s, 3H). <sup>13</sup>C NMR (126 MHz, Chloroform-*d*) δ 166.6, 159.6, 142.4, 131.9, 129.3, 123.8, 122.0, 119.3, 114.1, 62.0, 55.4, 39.6, 26.3, 25.7, 17.7, 16.6.

2. **Figure S1.** Binding curves and Scatchard plots (insert) of probe to ApisOBP9

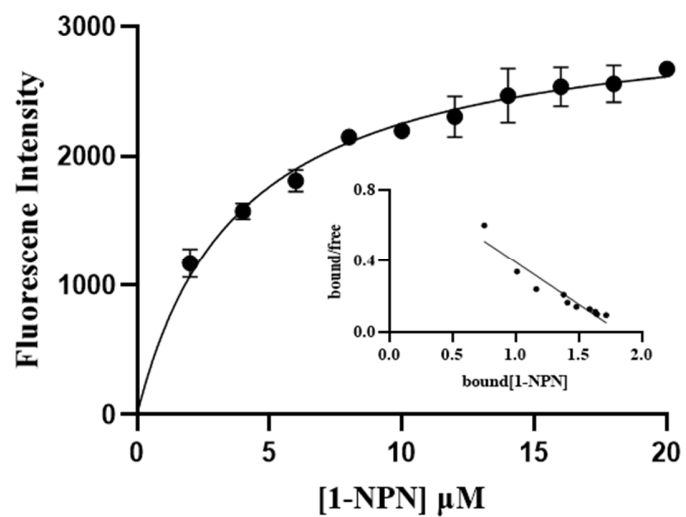

3. **Figure S2.** Competitive binding curves of compounds to ApisOBP9

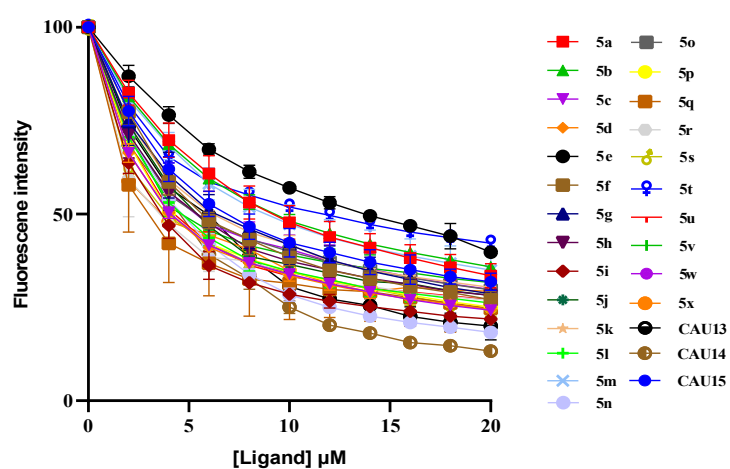

#### 4. $^1\text{H}$ NMR and $^{13}\text{C}$ NMR Spectrums of compounds **CAU13** and **5a-5x**

##### $^1\text{H}$ NMR of **CAU13**

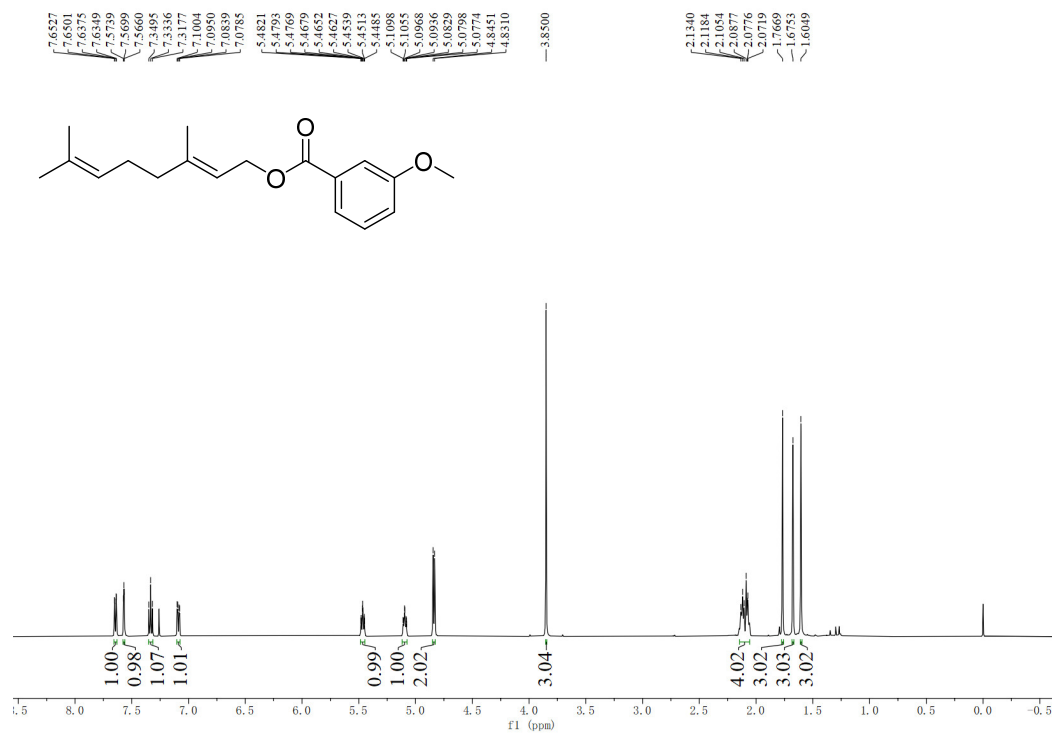

##### $^{13}\text{C}$ NMR of **CAU13**

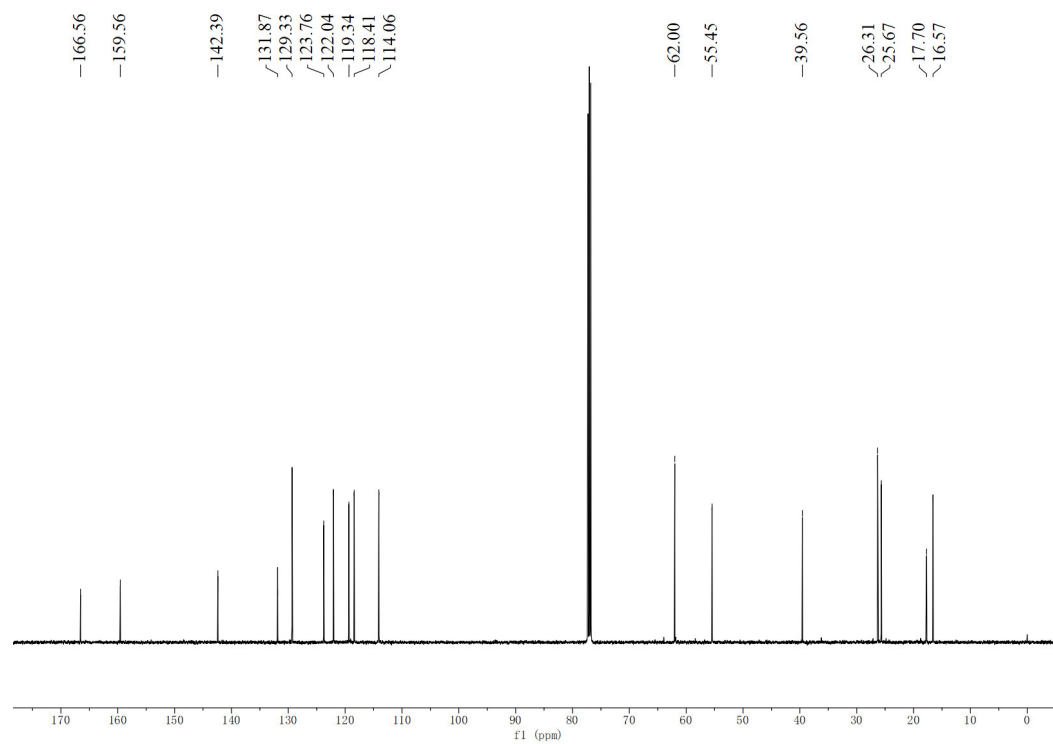

<sup>1</sup>H NMR of **5a**

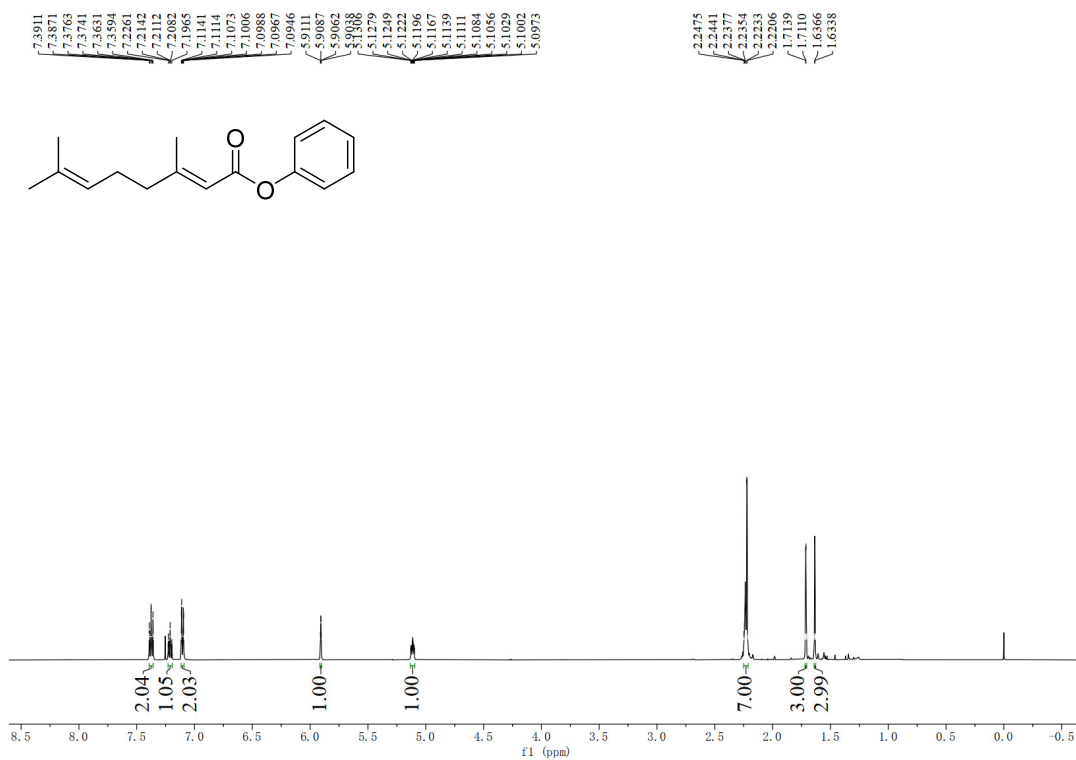

<sup>13</sup>C NMR of **5a**

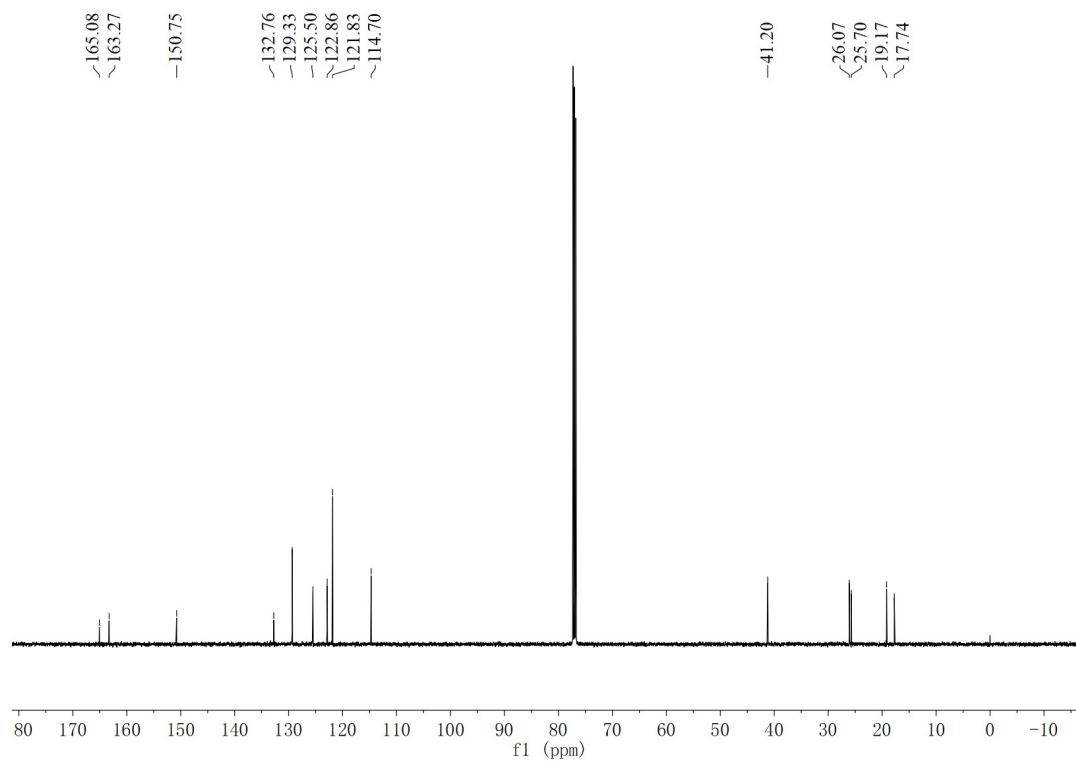

# <sup>1</sup>H NMR of **5b**

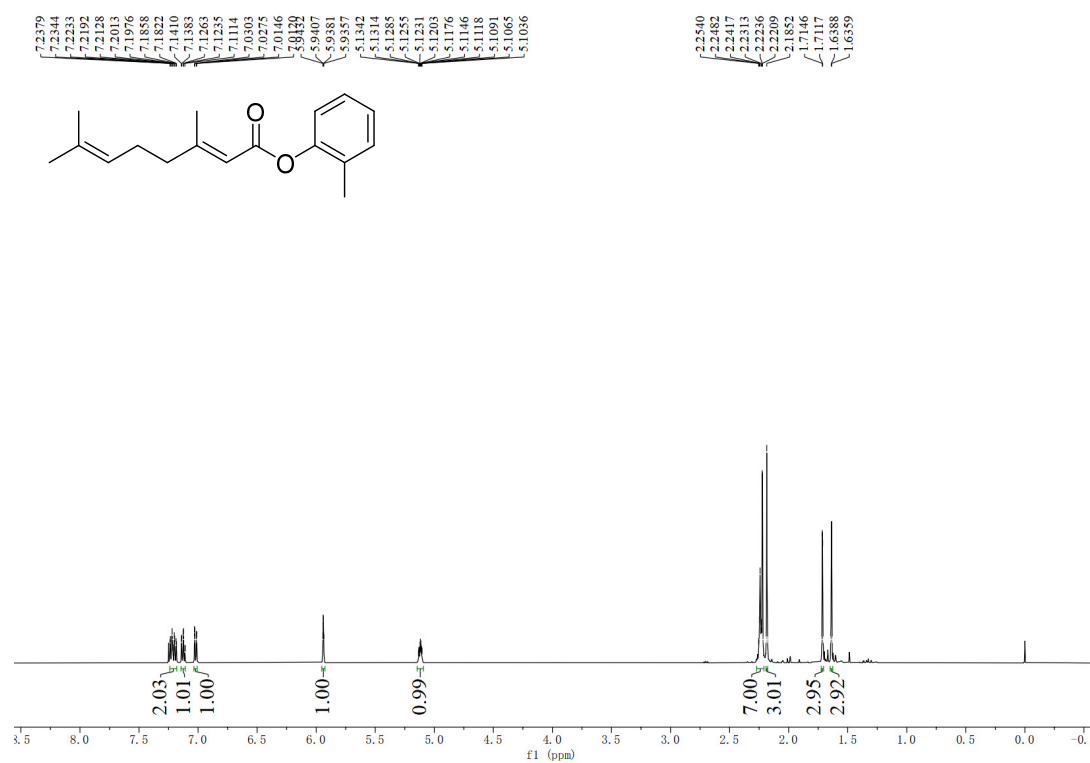

# <sup>13</sup>C NMR of **5b**

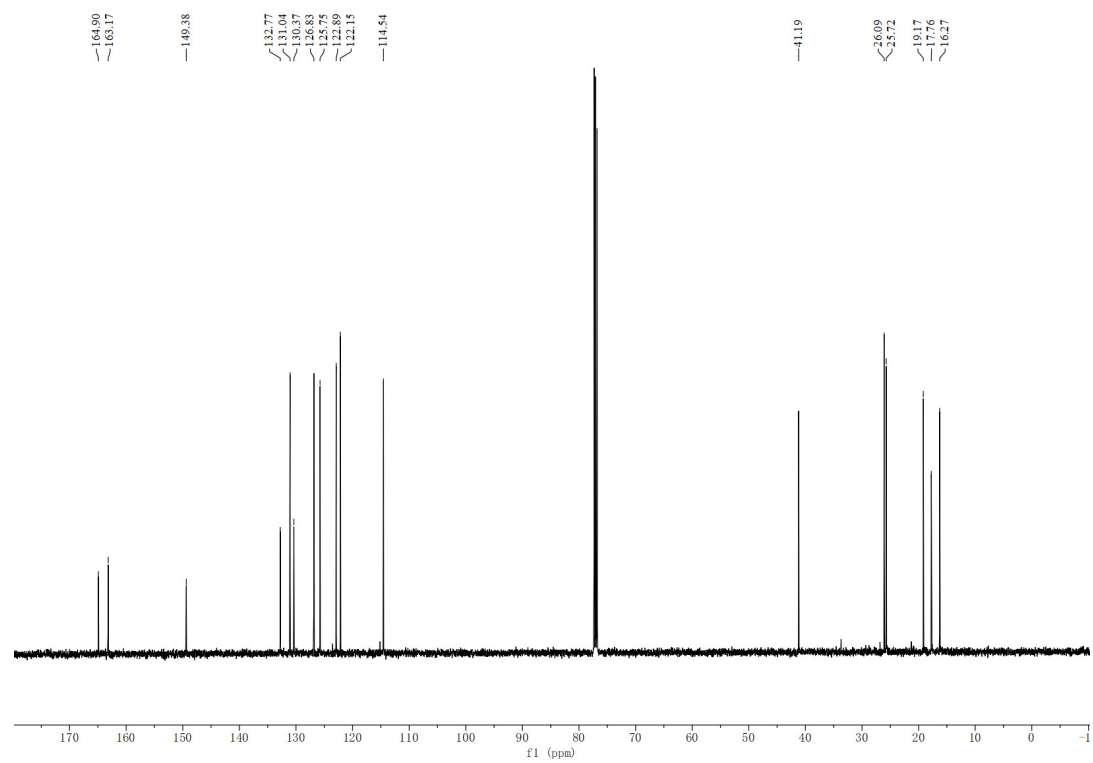

<sup>1</sup>H NMR of **5c**

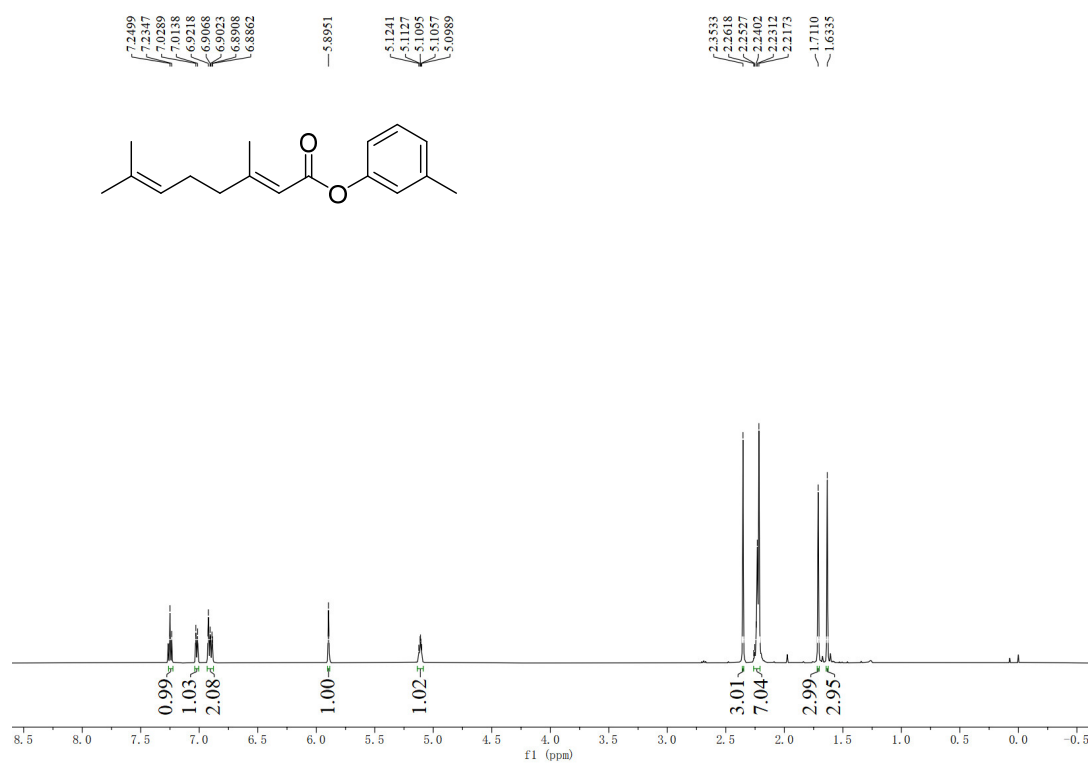

<sup>13</sup>C NMR of **5c**

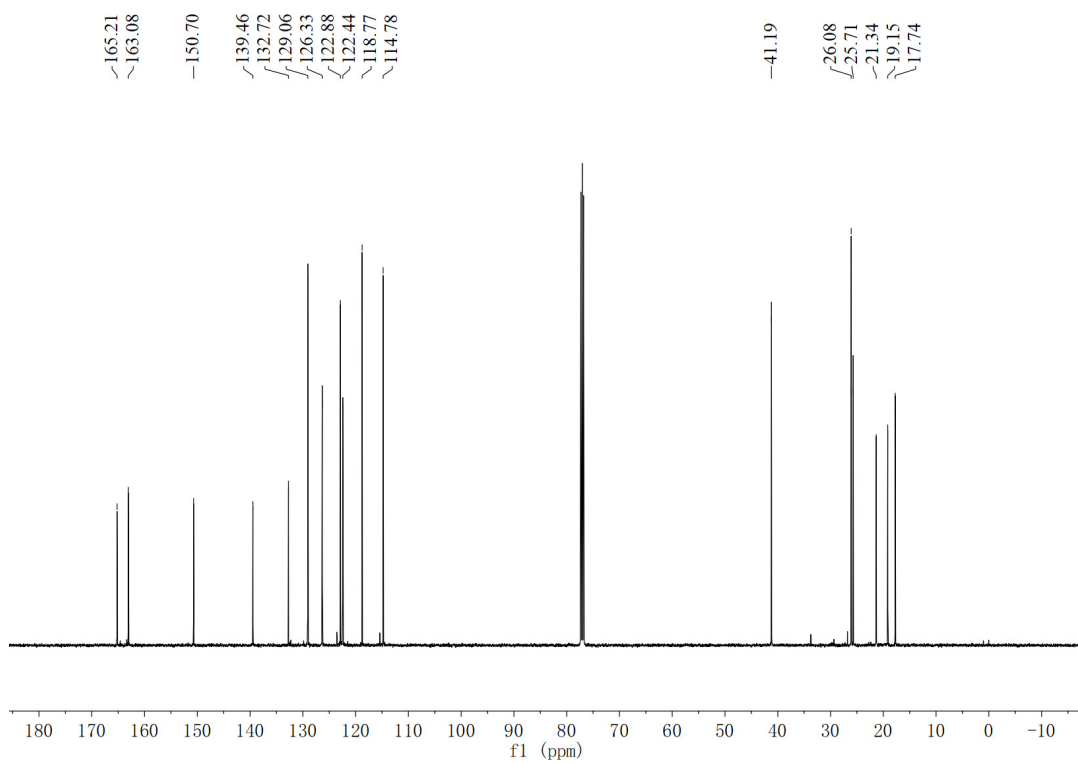



<sup>1</sup>H NMR of **5d**

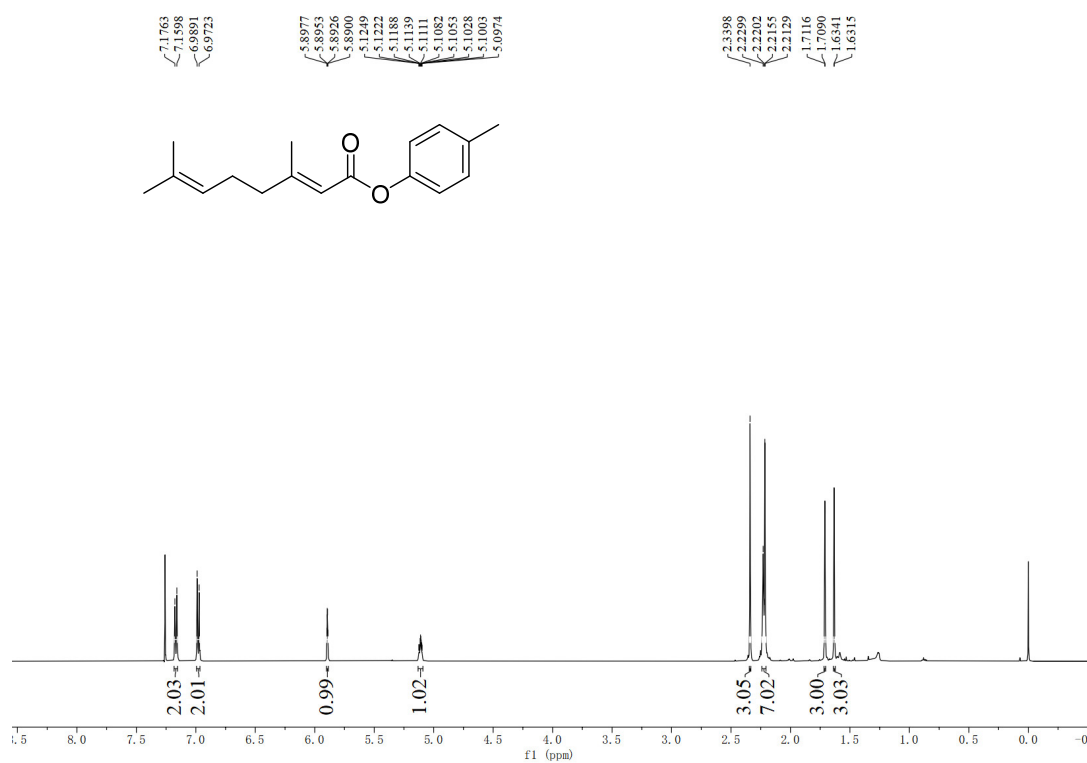

<sup>13</sup>C NMR of **5d**

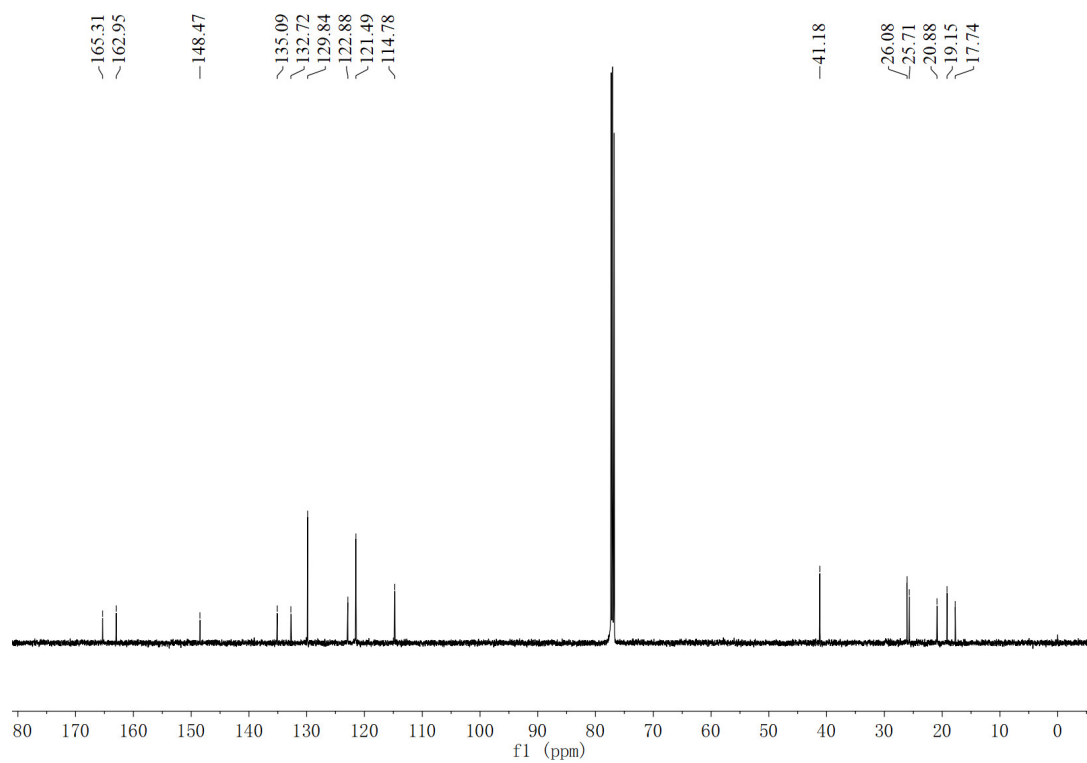

<sup>1</sup>H NMR of **5e**

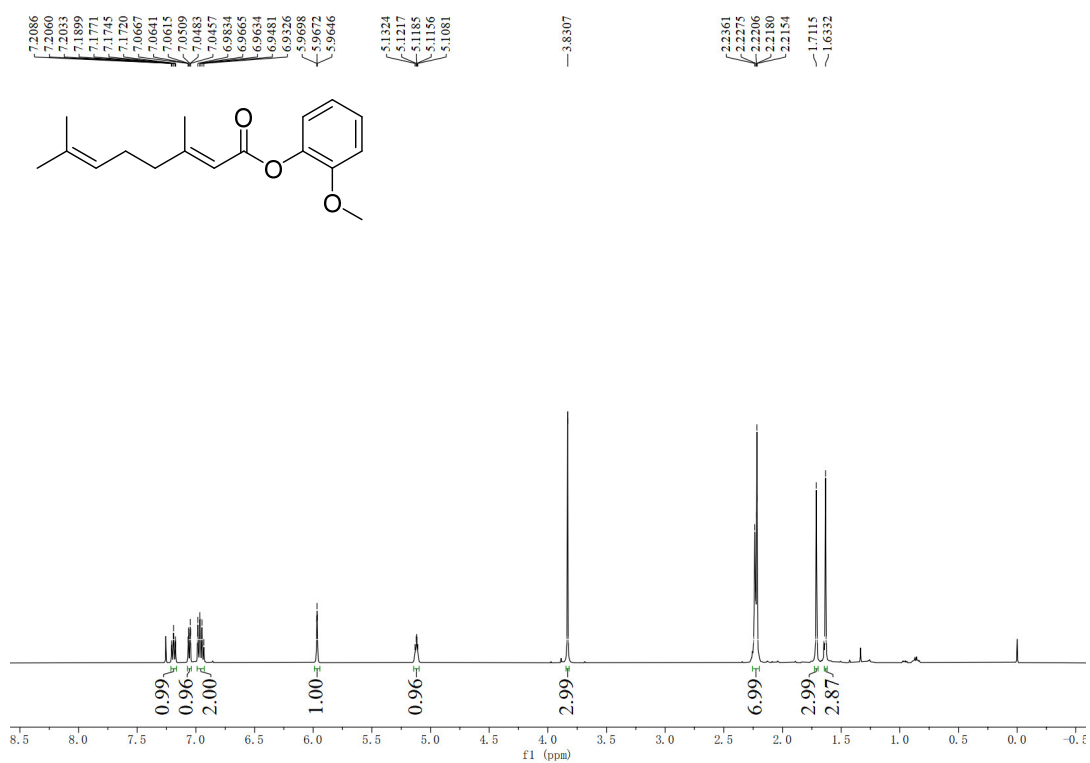

<sup>13</sup>C NMR of **5e**

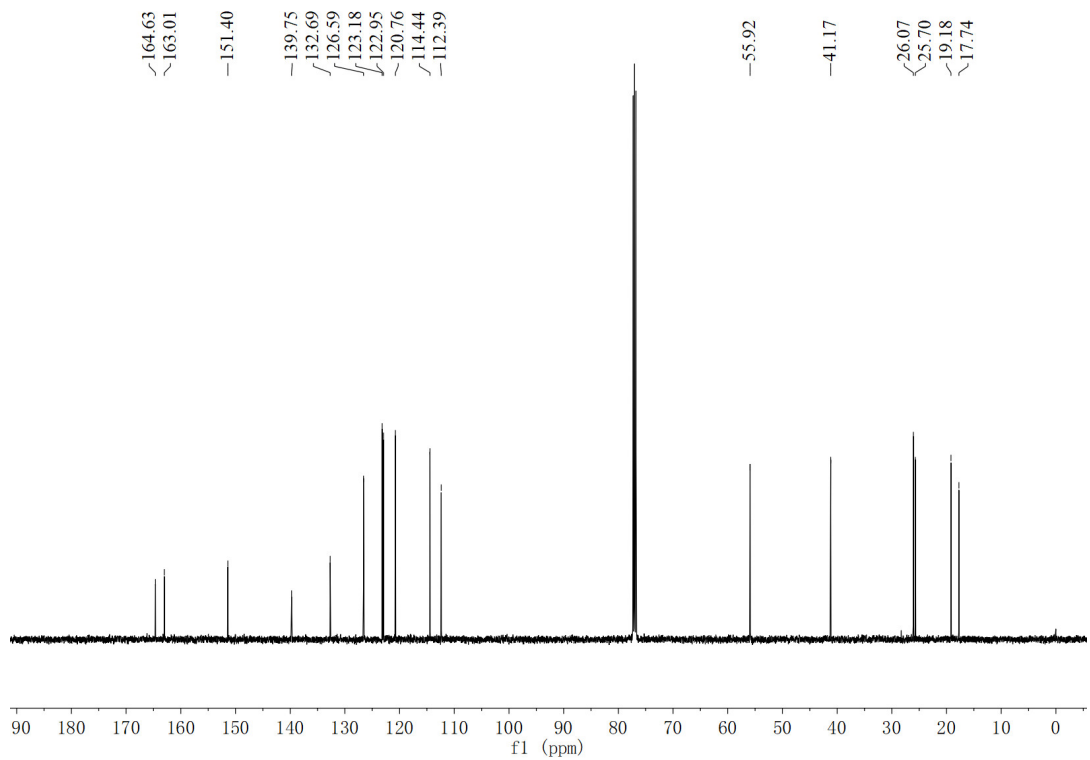

<sup>1</sup>H NMR of **5f**

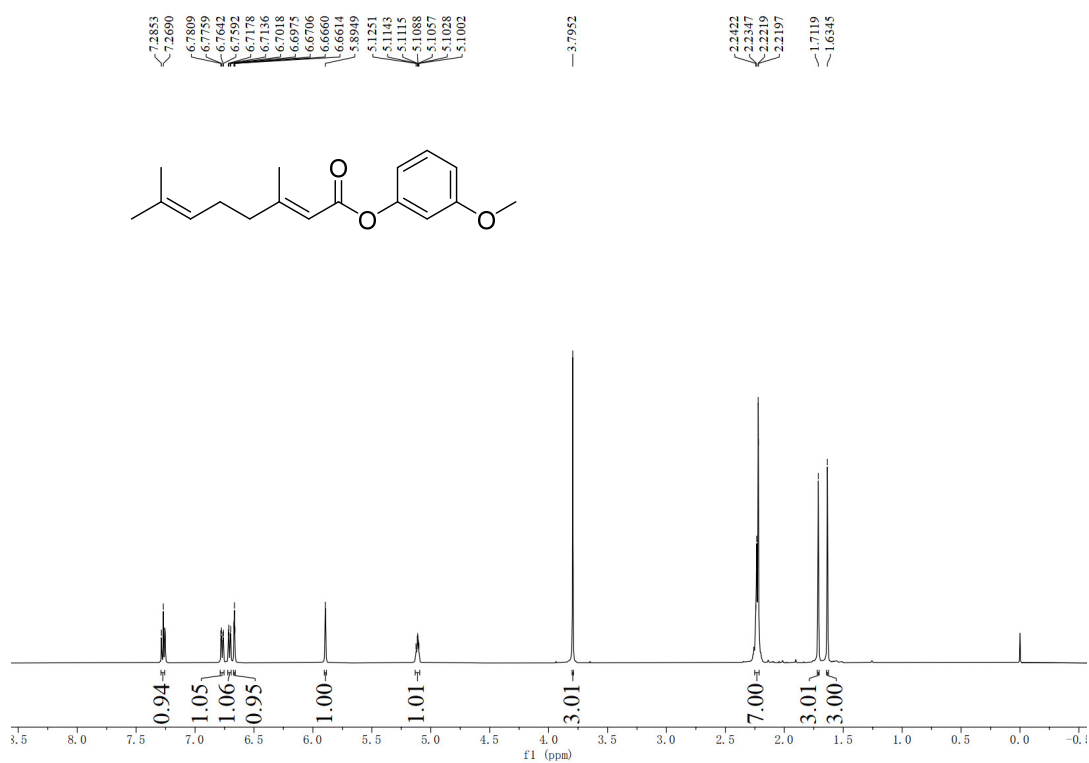

<sup>13</sup>C NMR of **5f**

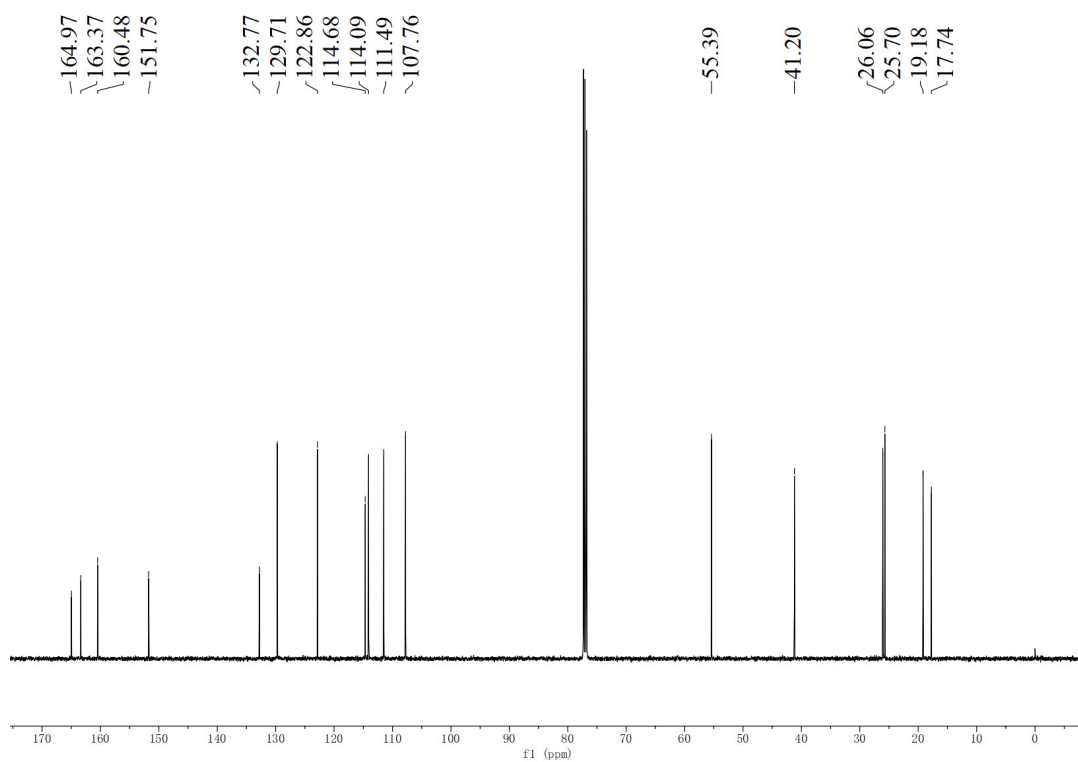

<sup>1</sup>H NMR of **5g**

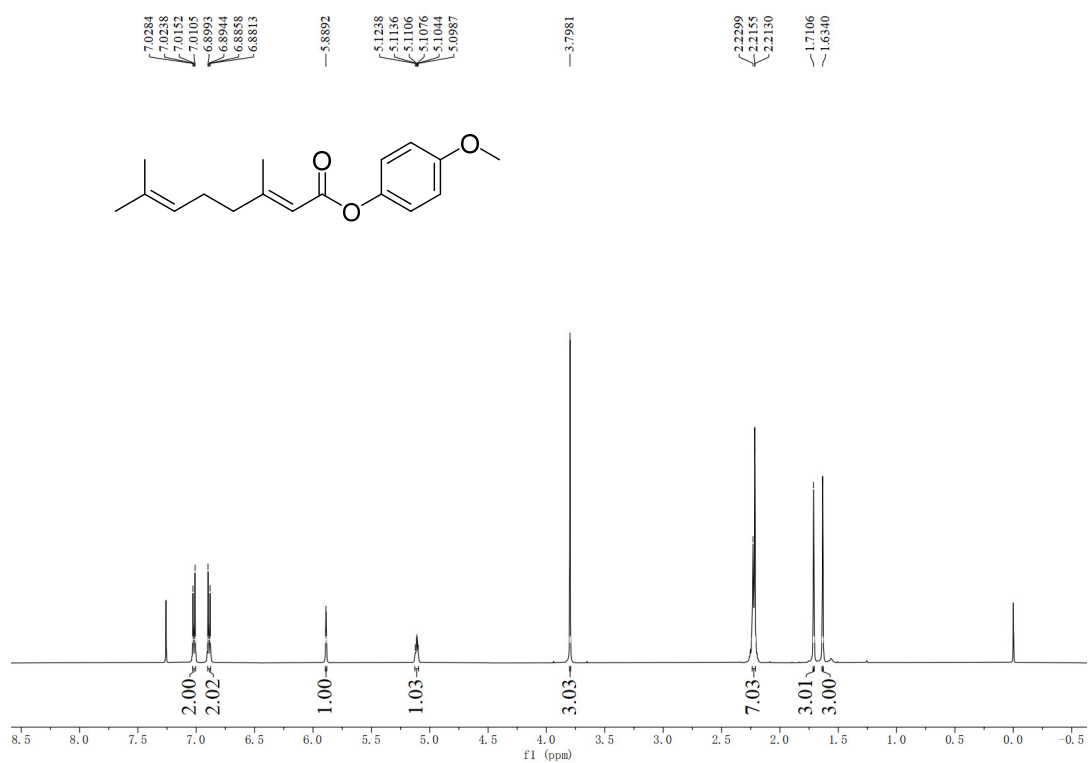

<sup>13</sup>C NMR of **5g**

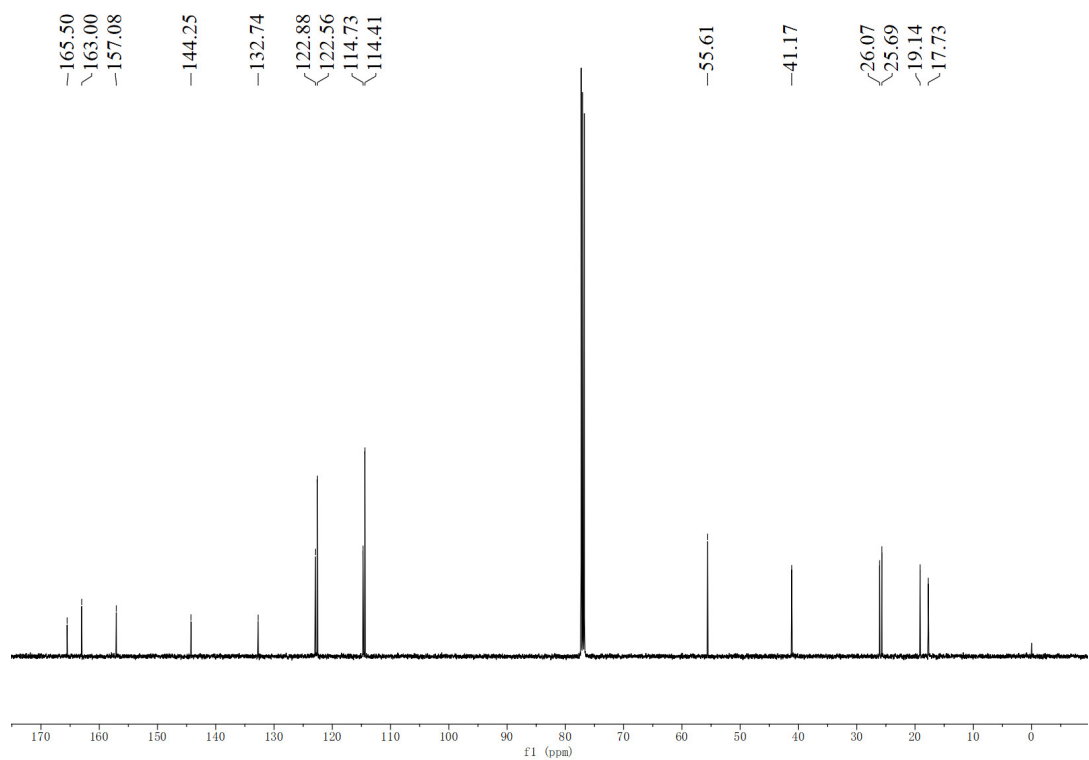

<sup>1</sup>H NMR of **5h**

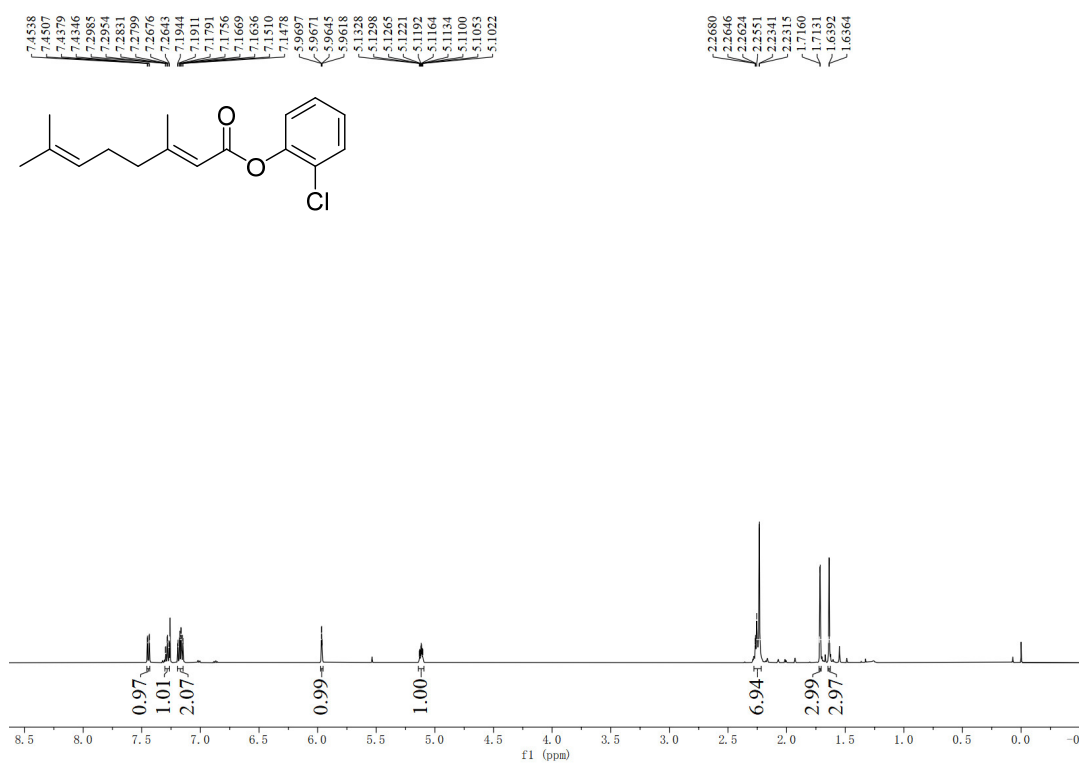

<sup>13</sup>C NMR of **5h**

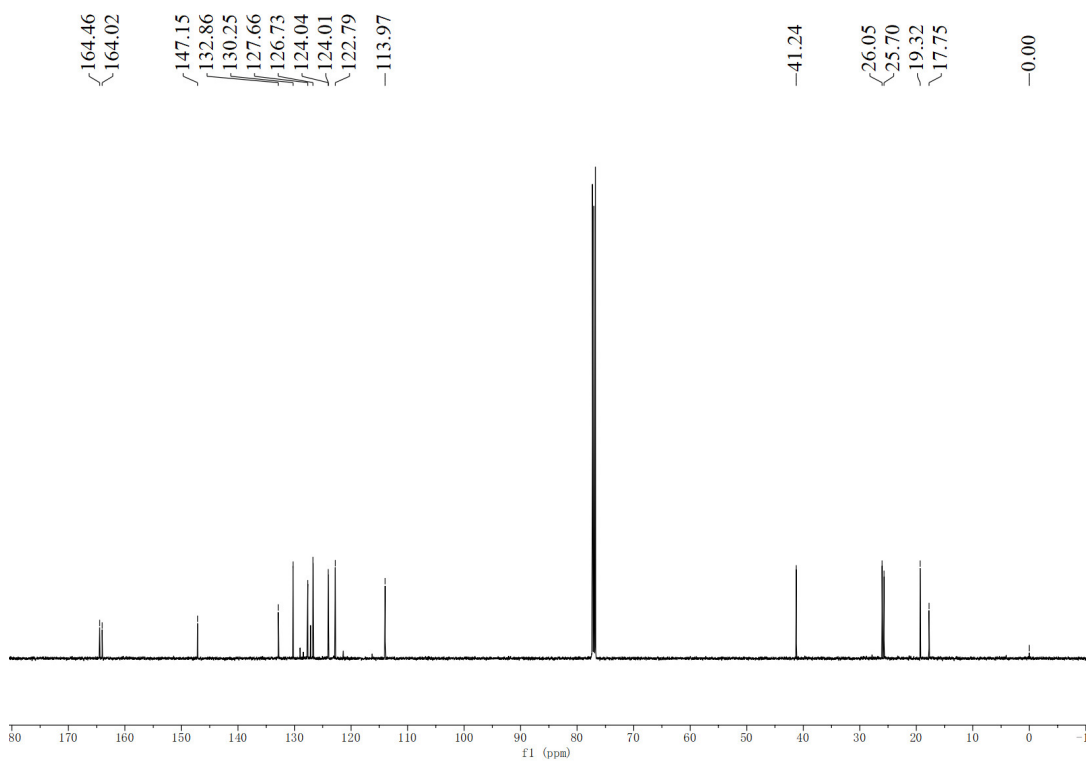

<sup>1</sup>H NMR of **5i**

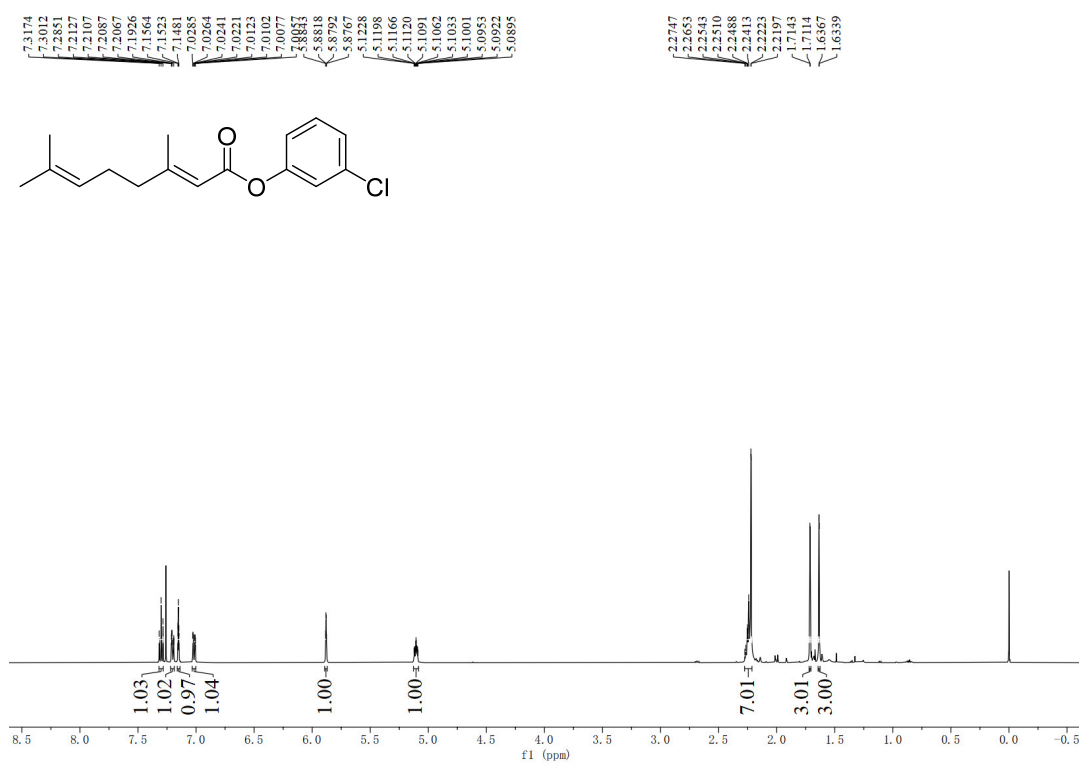

<sup>13</sup>C NMR of **5i**

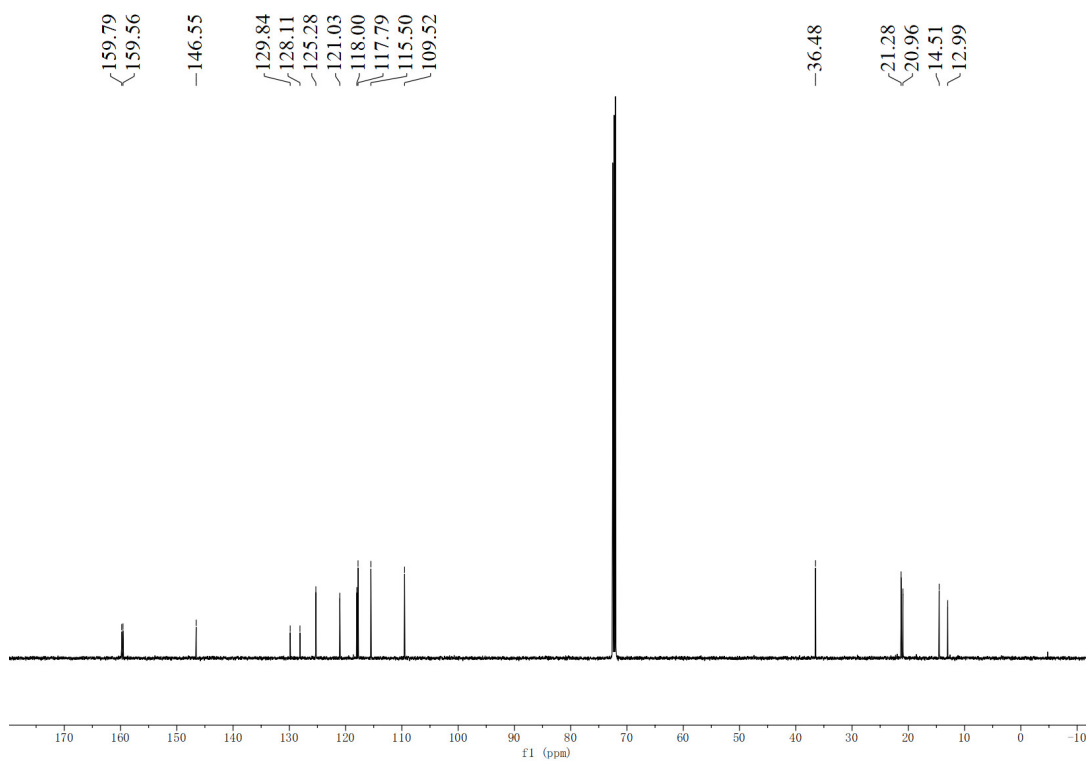

<sup>1</sup>H NMR of **5j**

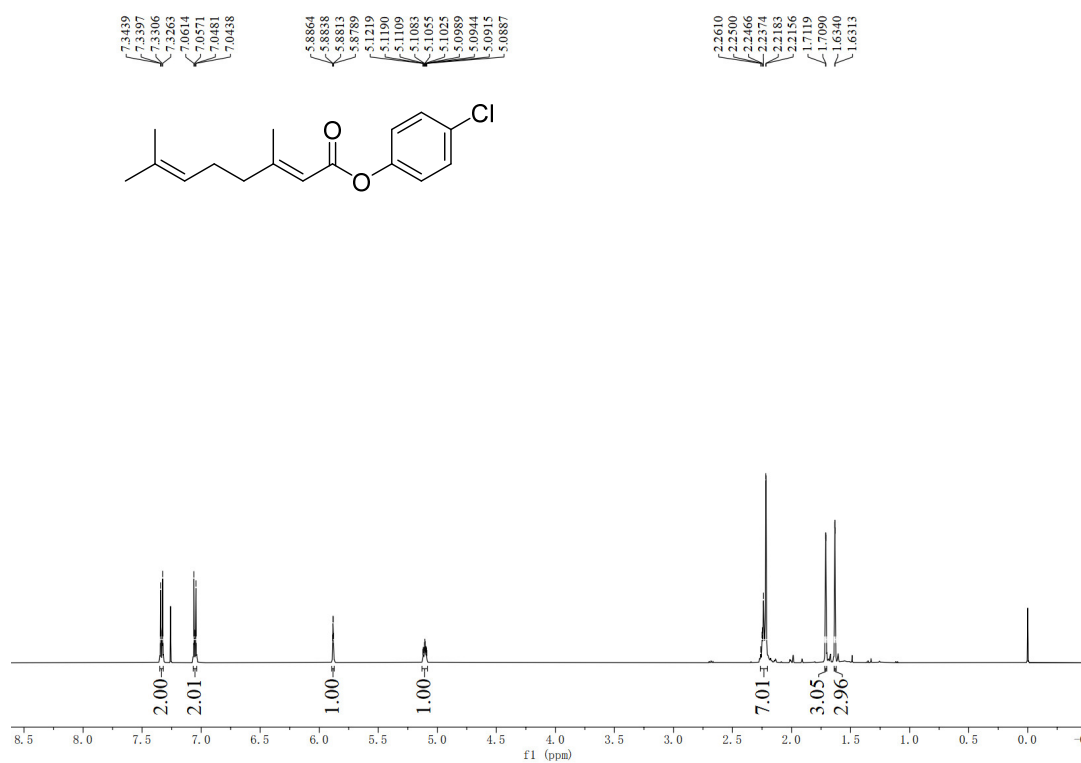

<sup>13</sup>C NMR of **5j**

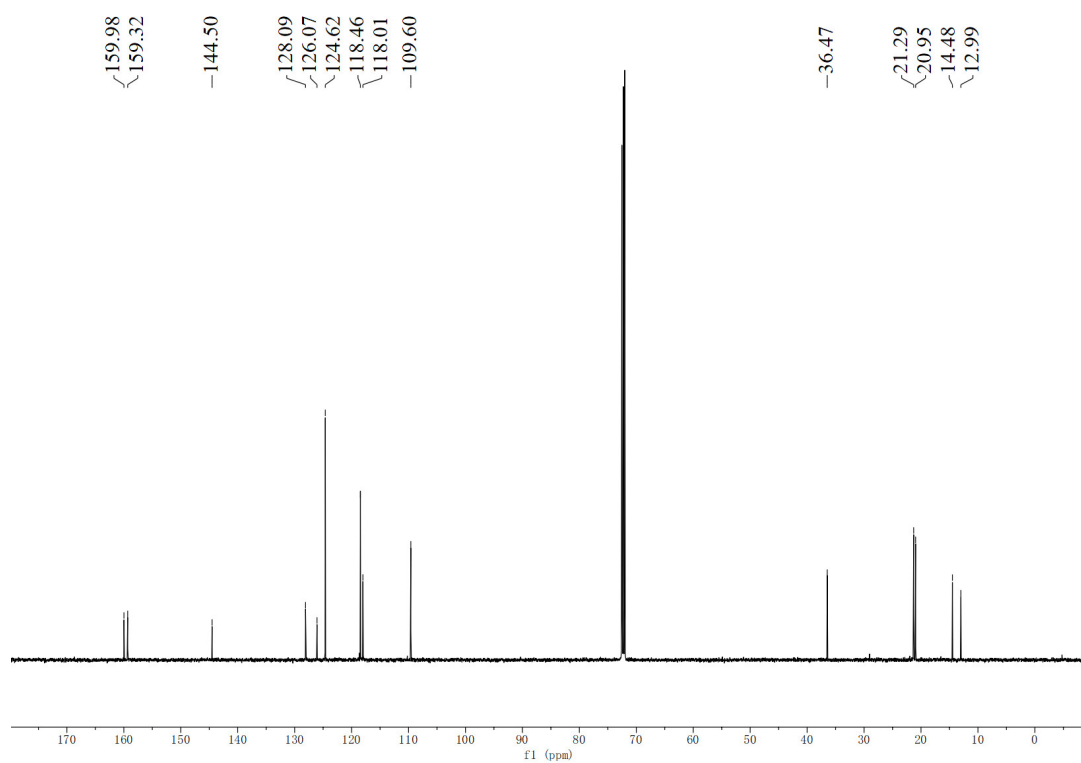

<sup>1</sup>H NMR of **5k**

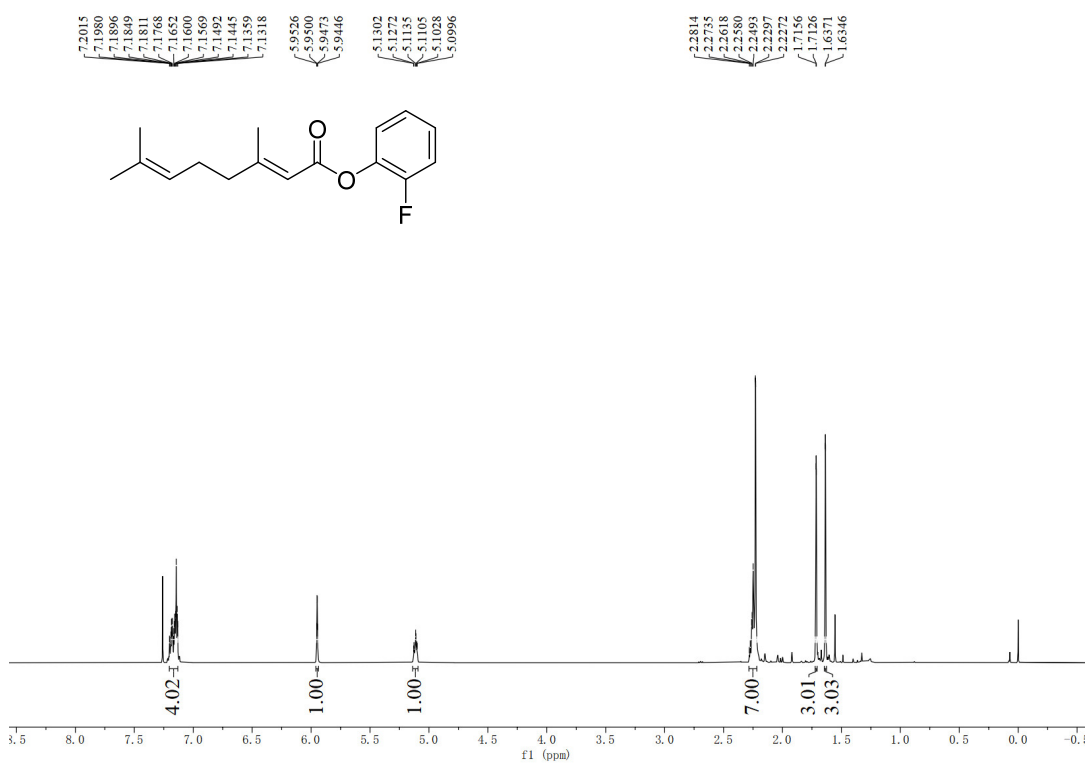

<sup>13</sup>C NMR of **5k**

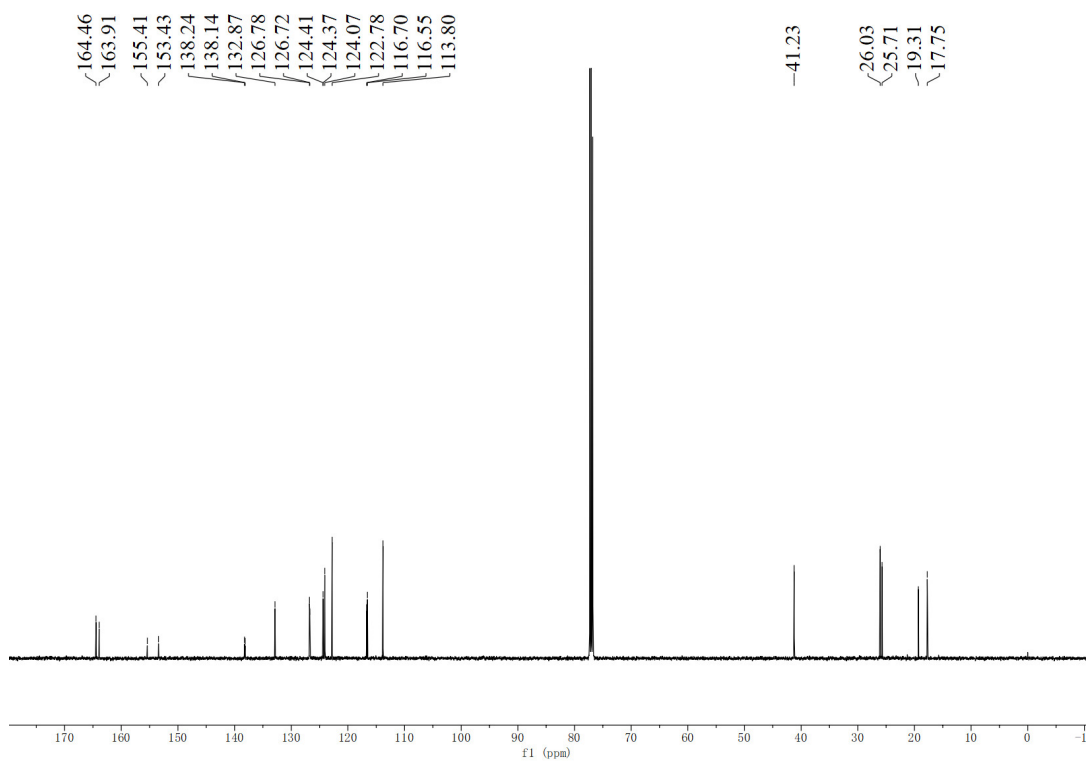



<sup>1</sup>H NMR of **5l**

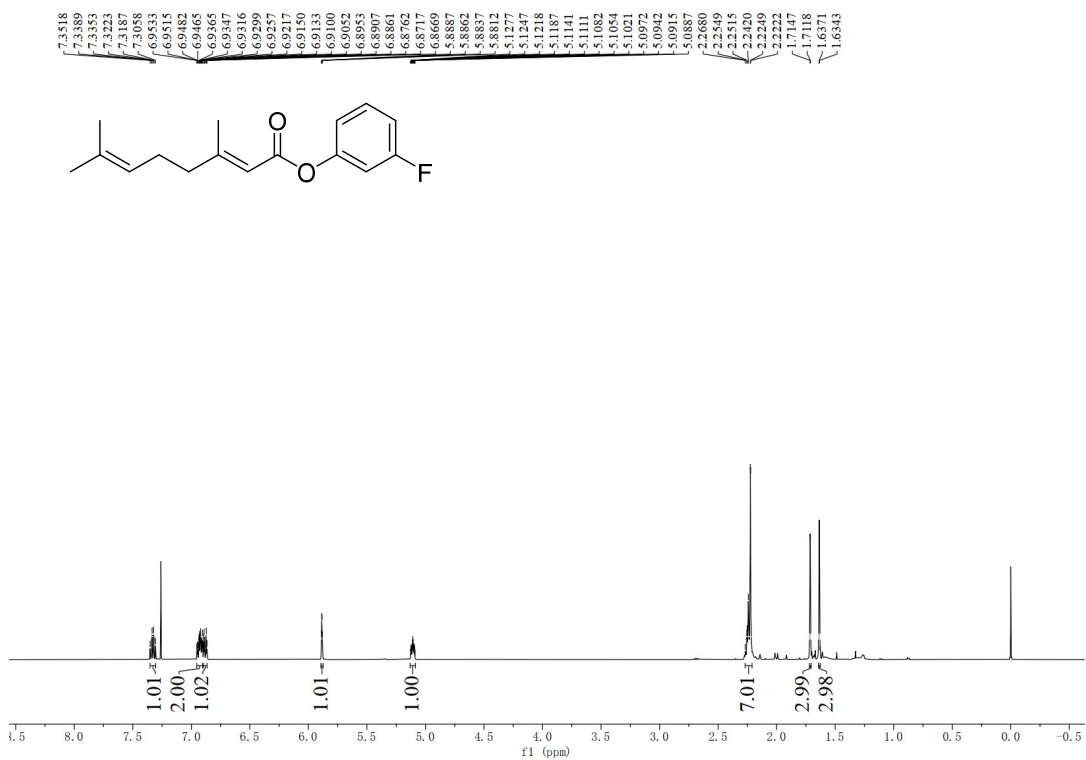

<sup>13</sup>C NMR of **5l**

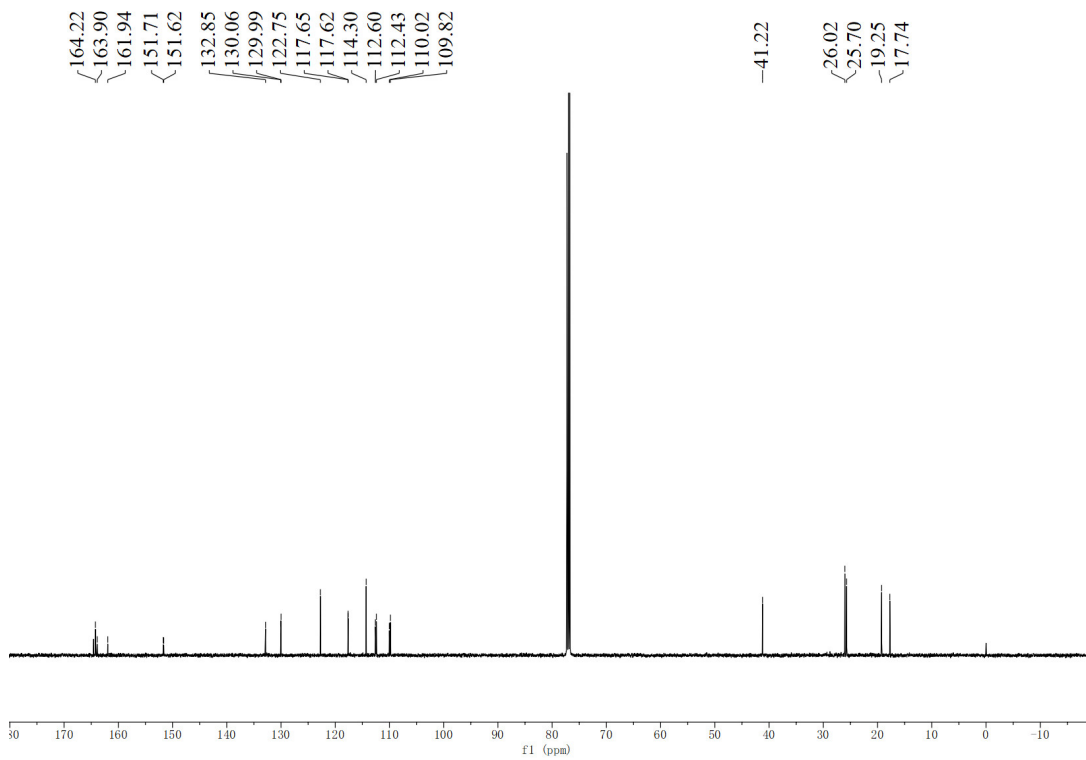

<sup>1</sup>H NMR of **5m**

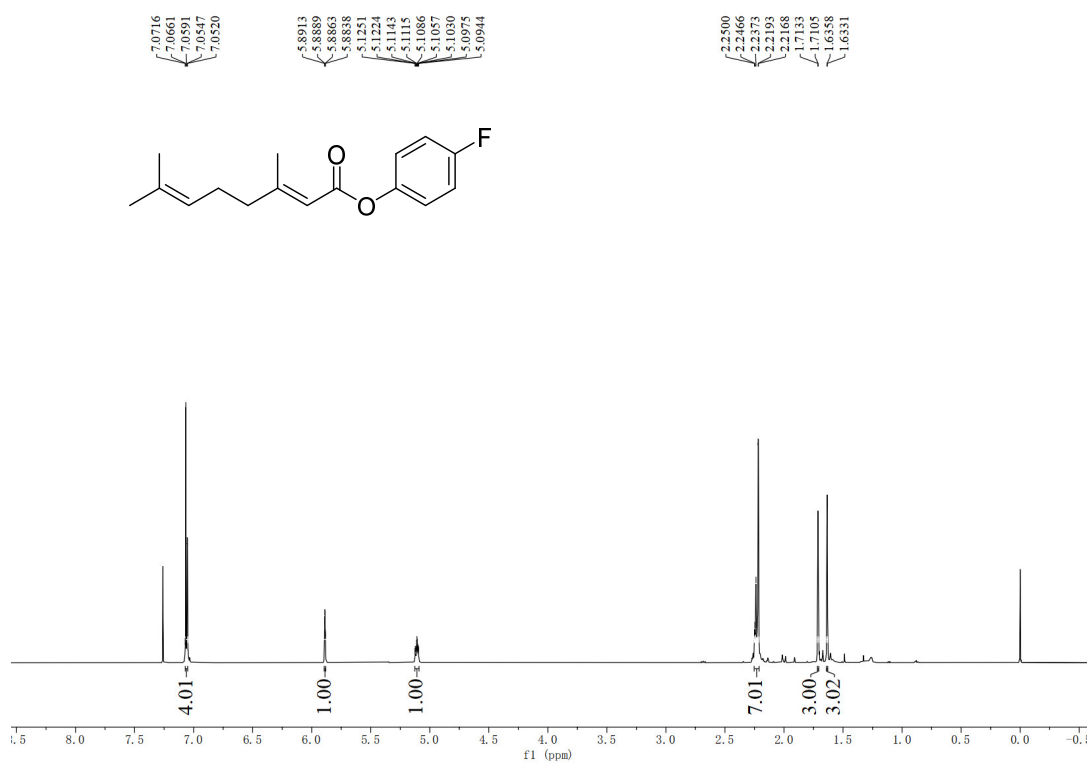

<sup>13</sup>C NMR of **5m**

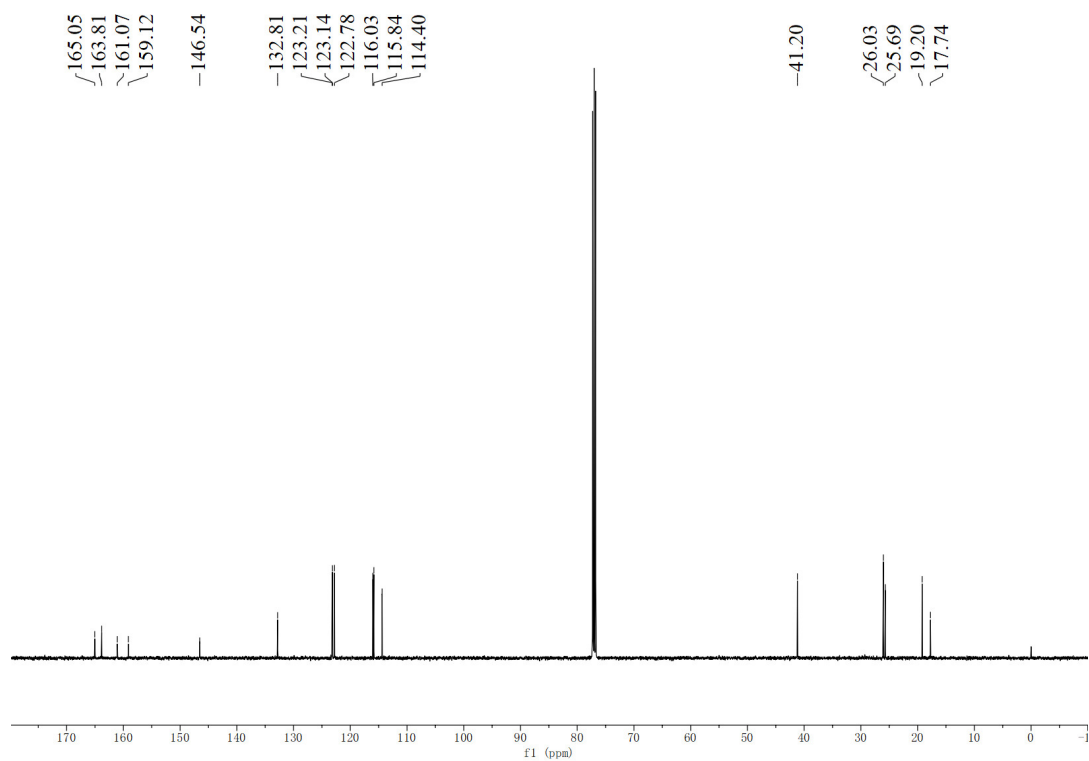

<sup>1</sup>H NMR of **5n**

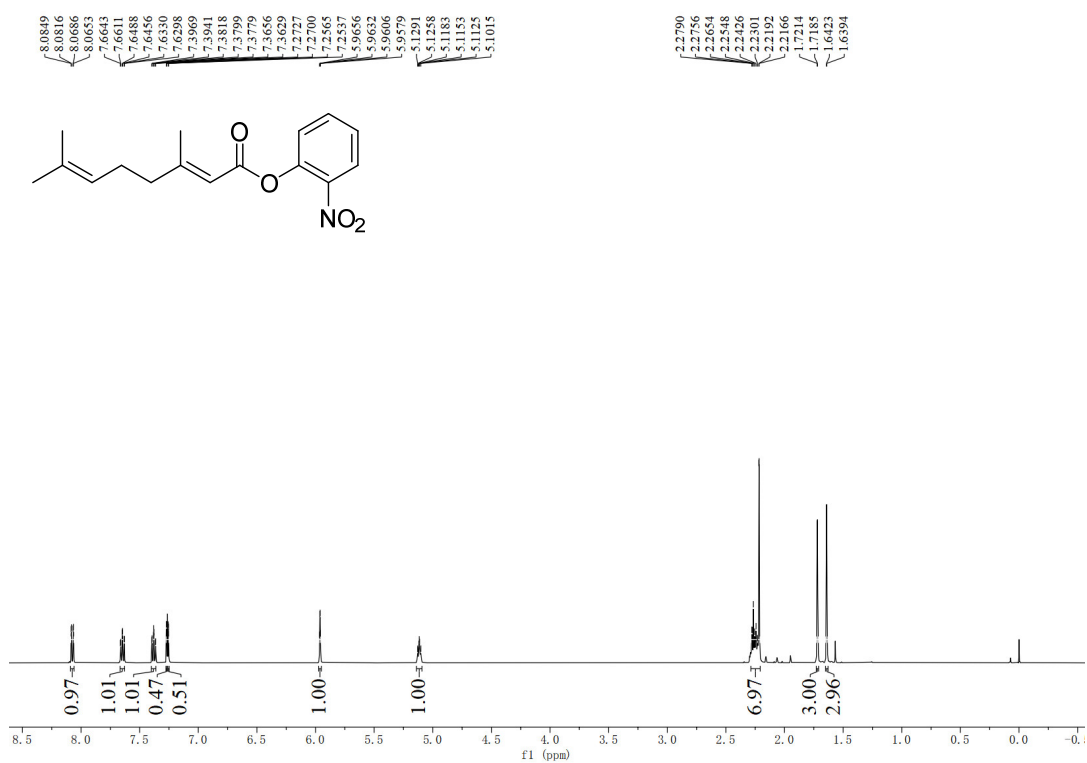

<sup>13</sup>C NMR of **5n**

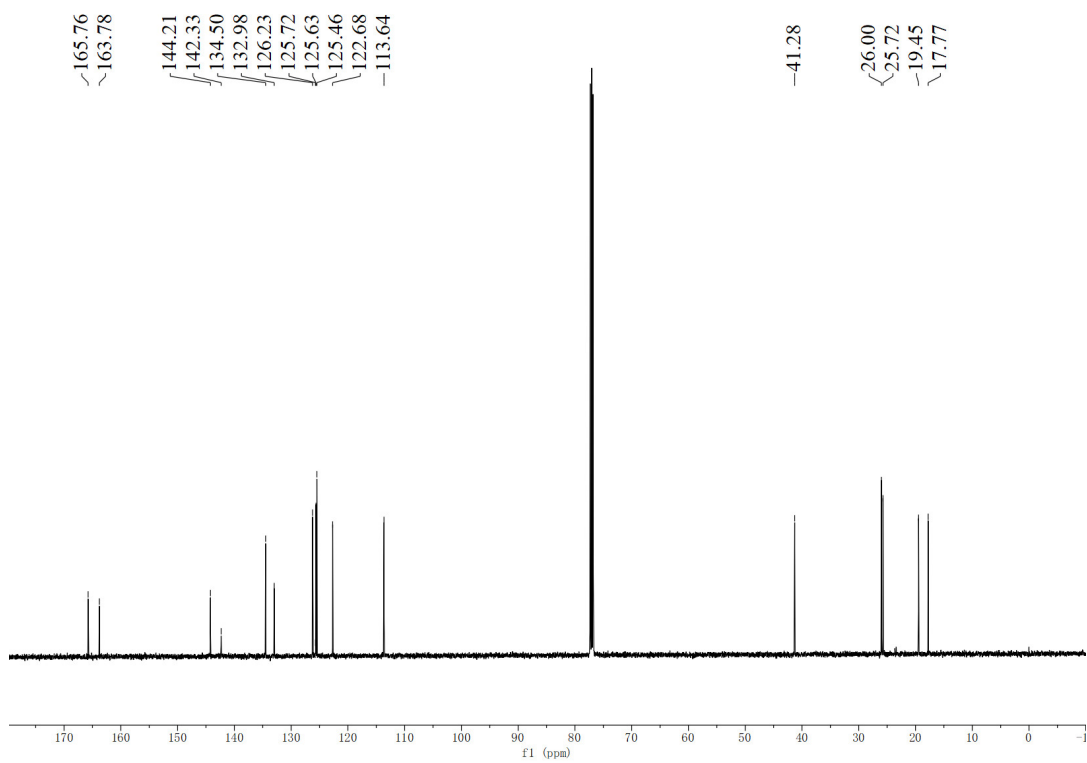

<sup>1</sup>H NMR of **5o**

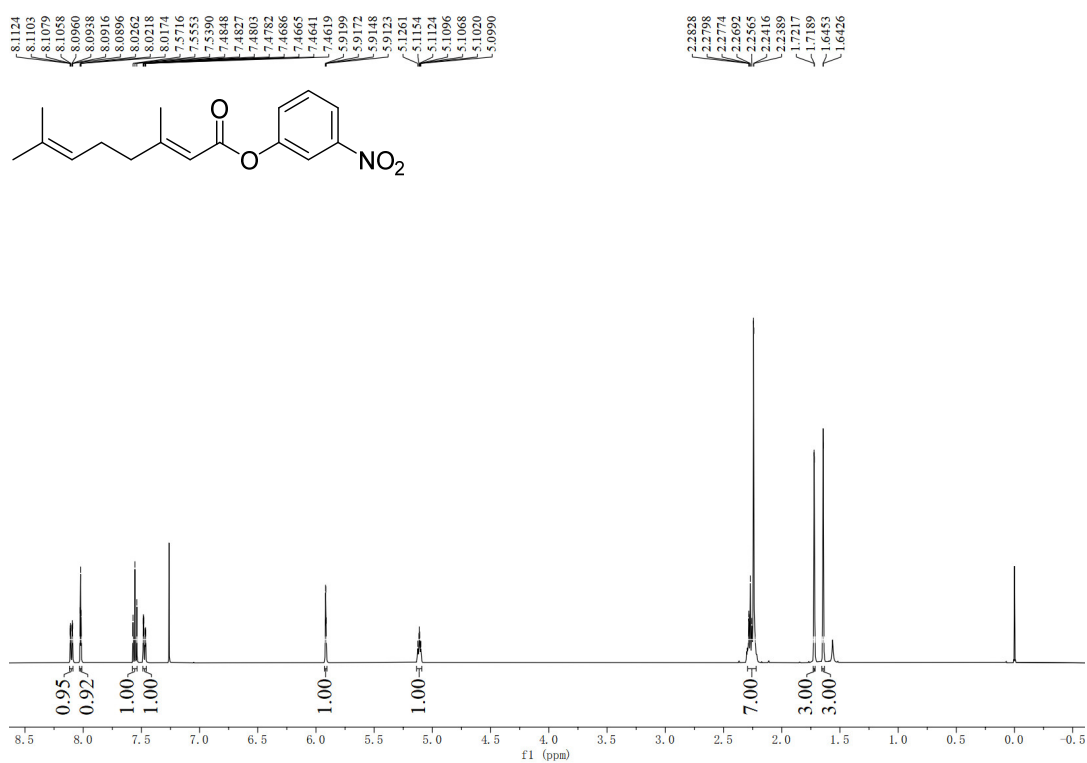

<sup>13</sup>C NMR of **5o**

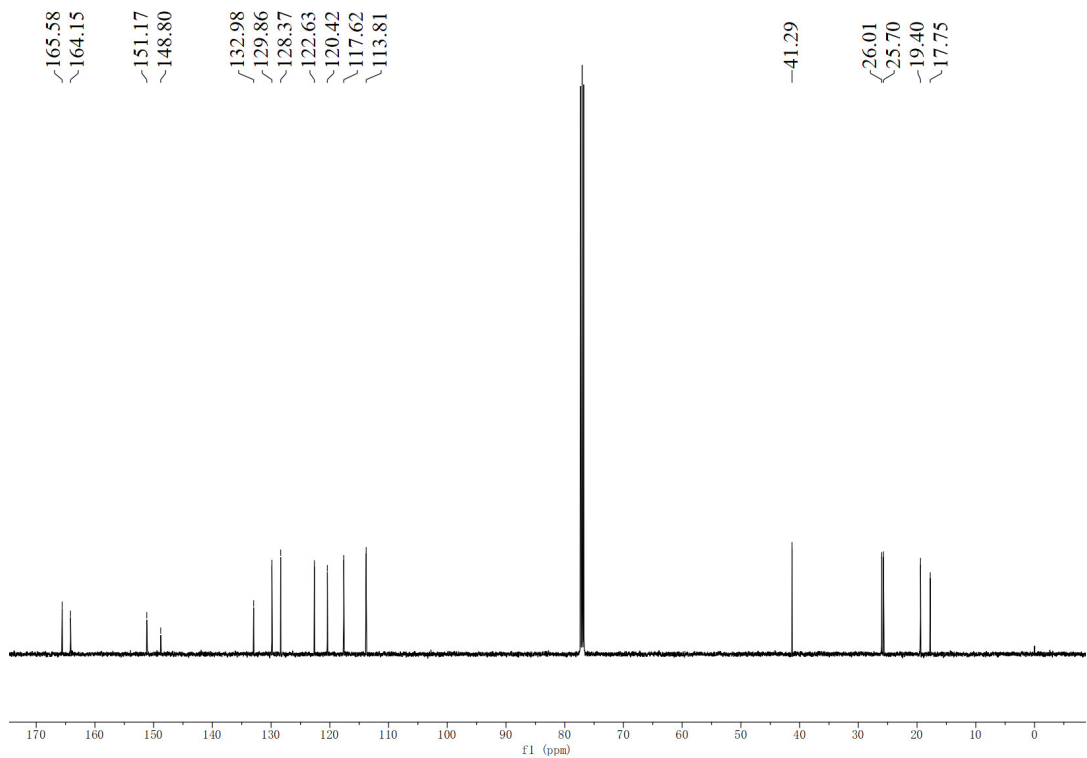

<sup>1</sup>H NMR of **5p**

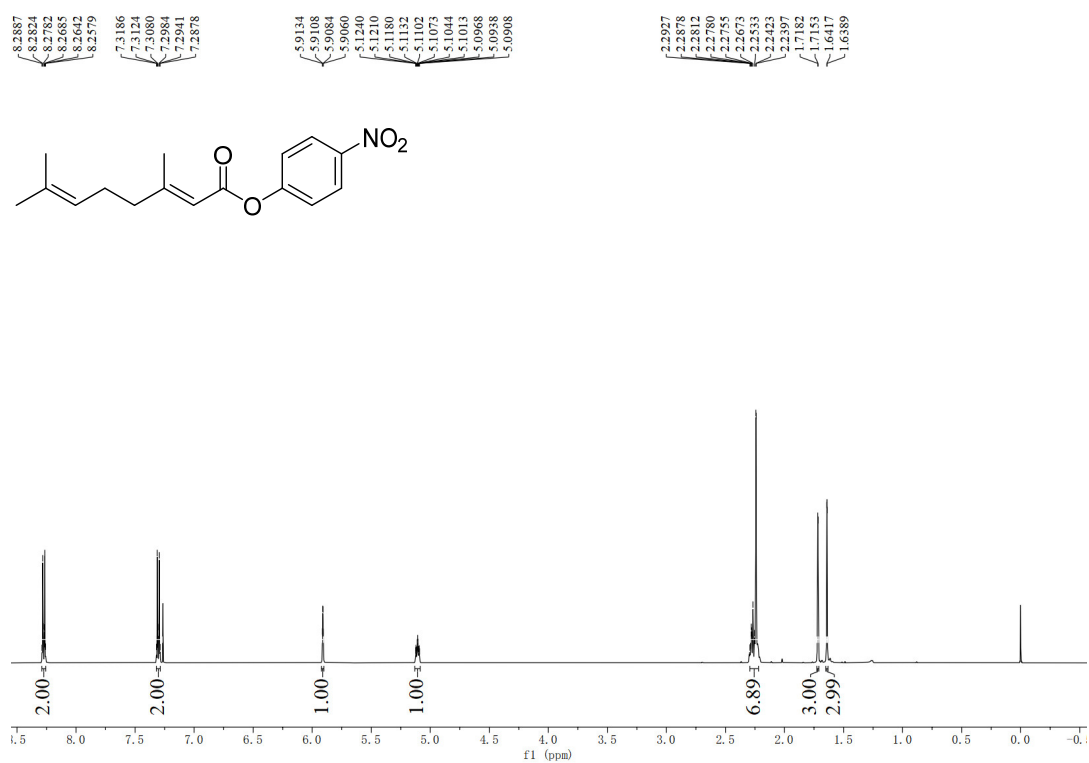

<sup>13</sup>C NMR of **5p**

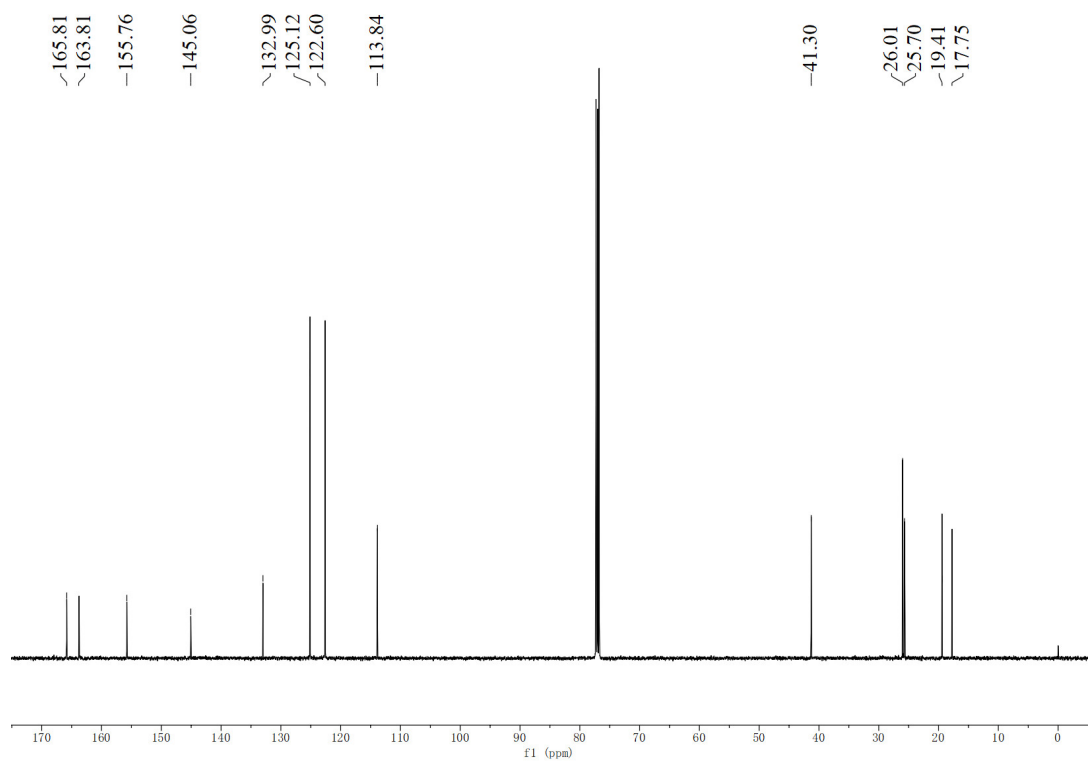

<sup>1</sup>H NMR of **5q**

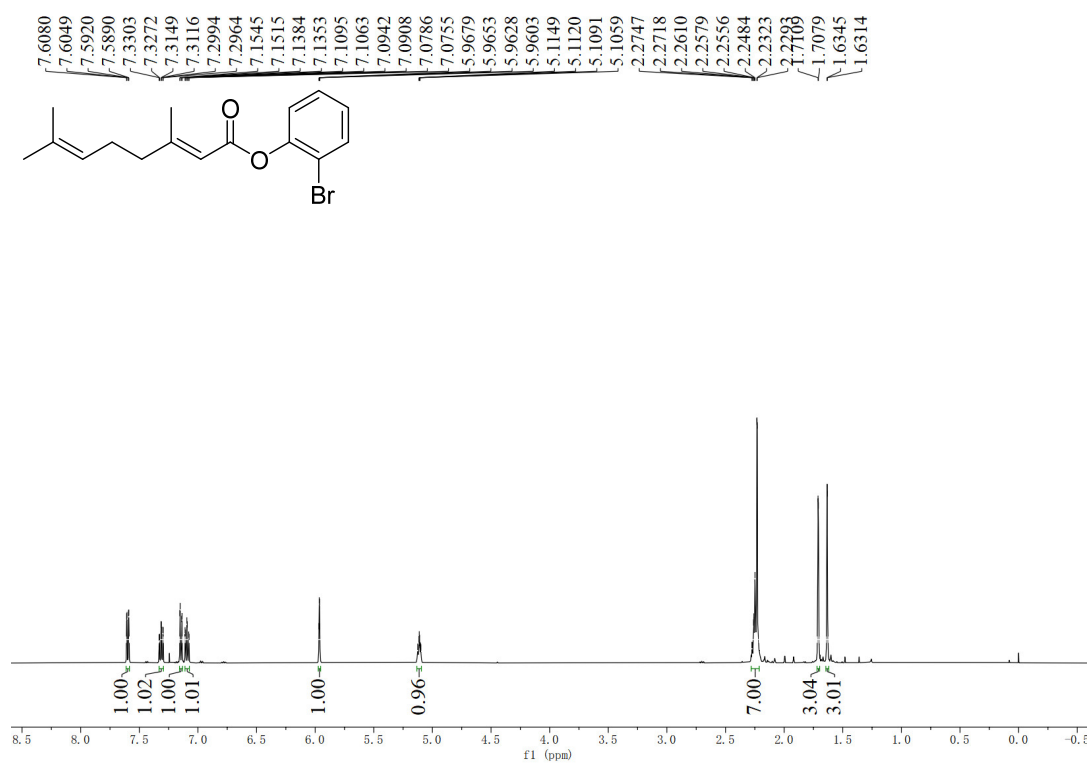

<sup>13</sup>C NMR of **5q**

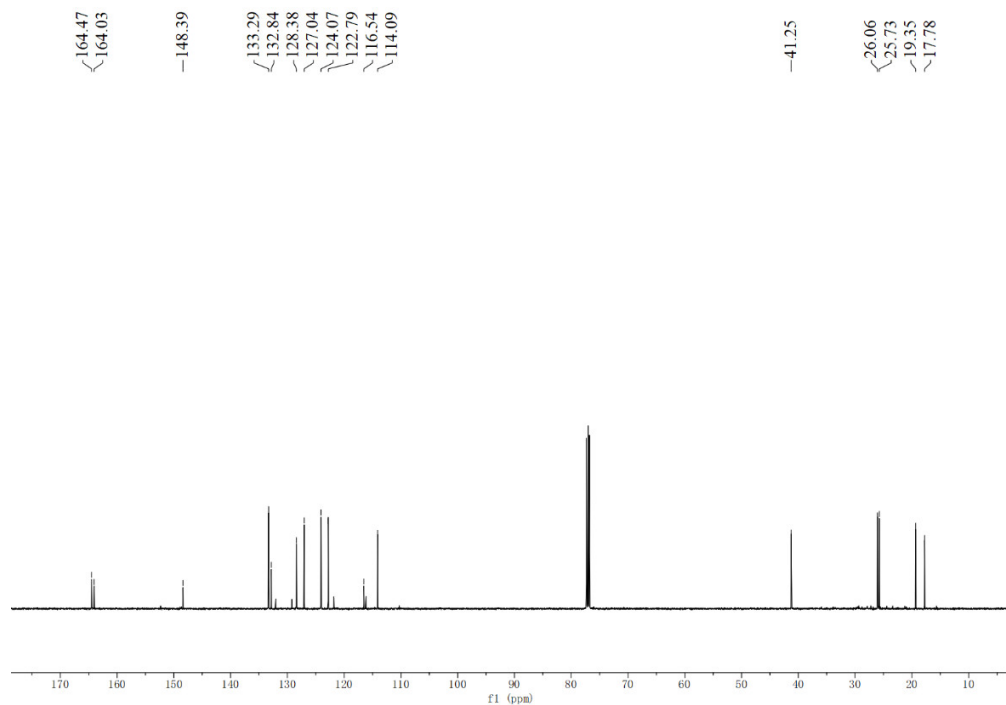

# <sup>1</sup>H NMR of **5r**

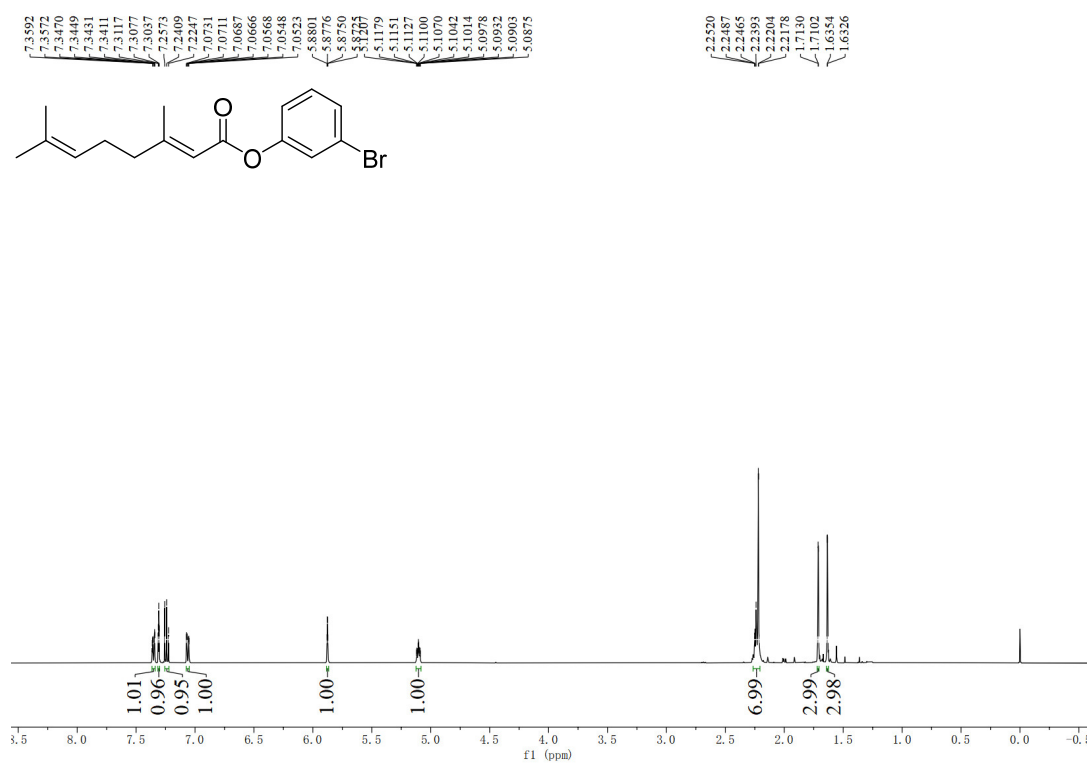

## <sup>13</sup>C NMR of **5r**

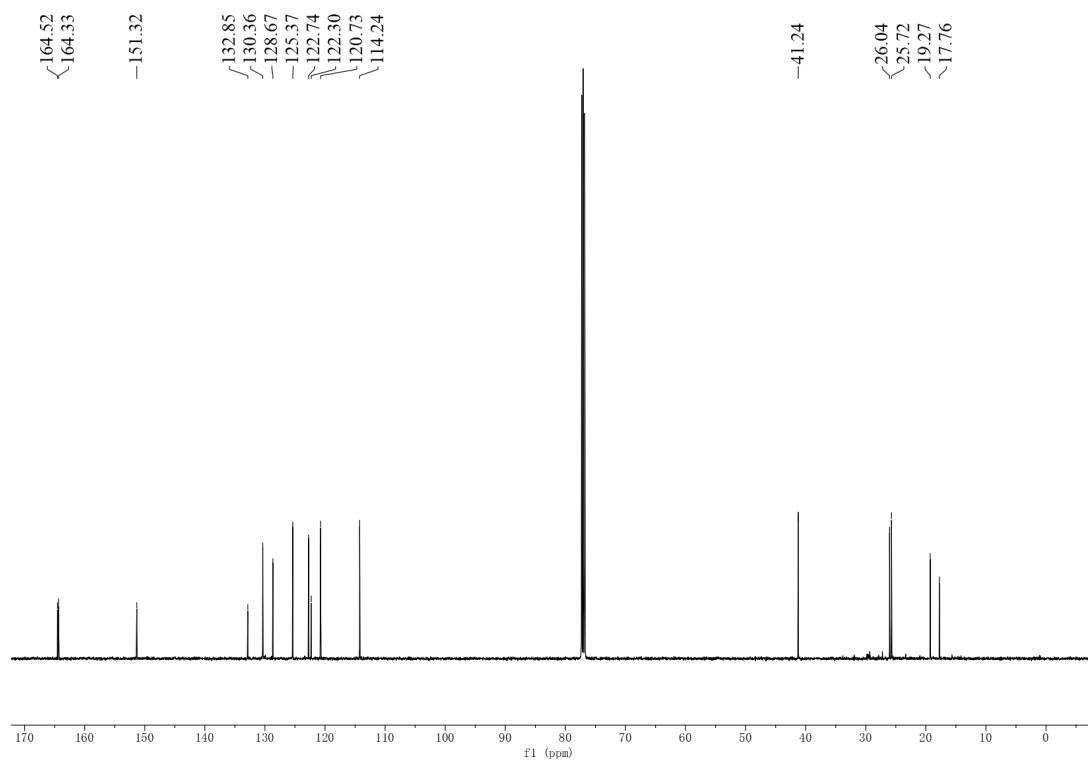

<sup>1</sup>H NMR of **5s**

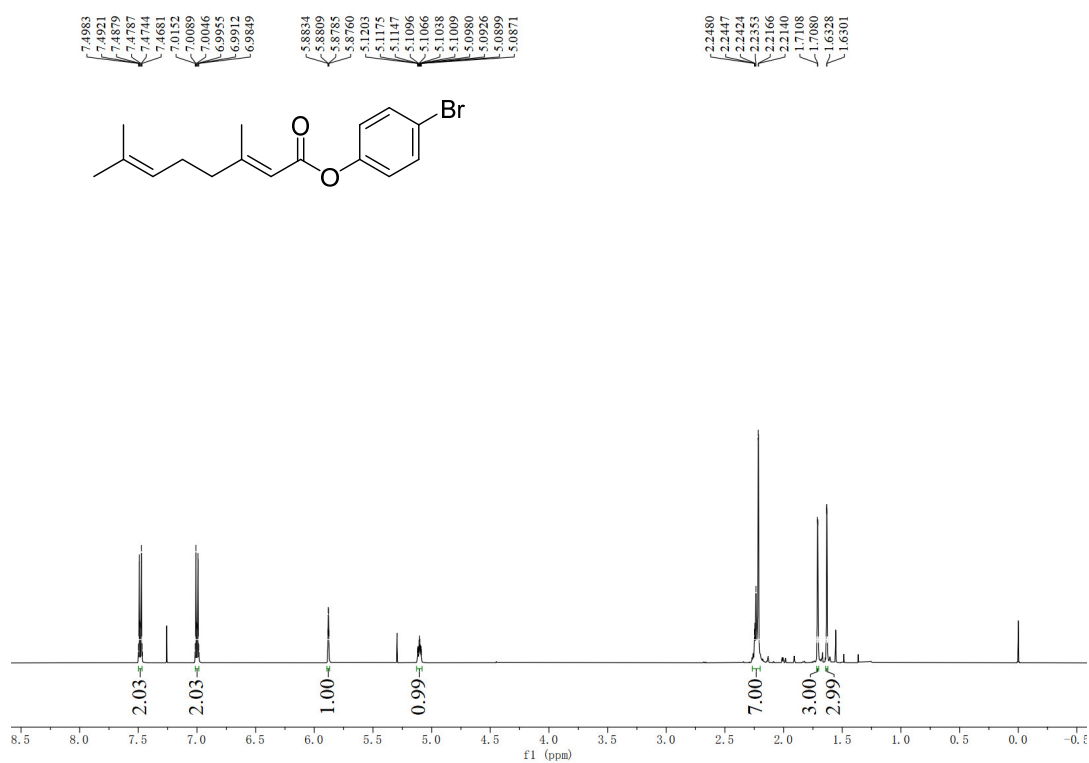

<sup>13</sup>C NMR of **5s**

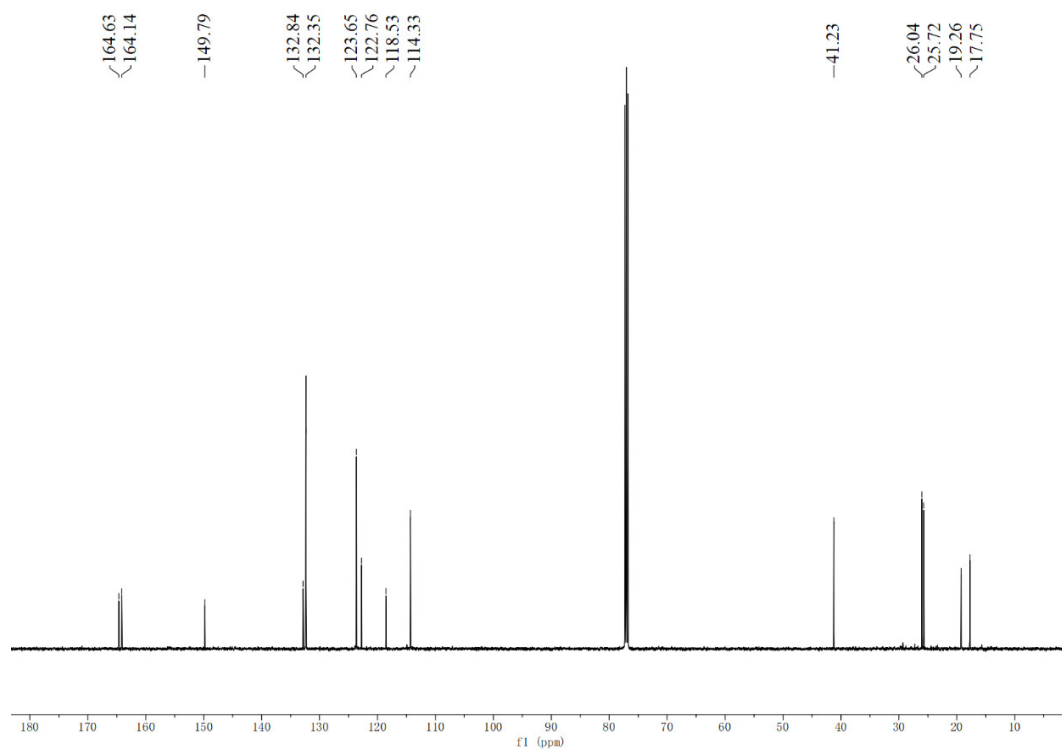



<sup>1</sup>H NMR of **5t**

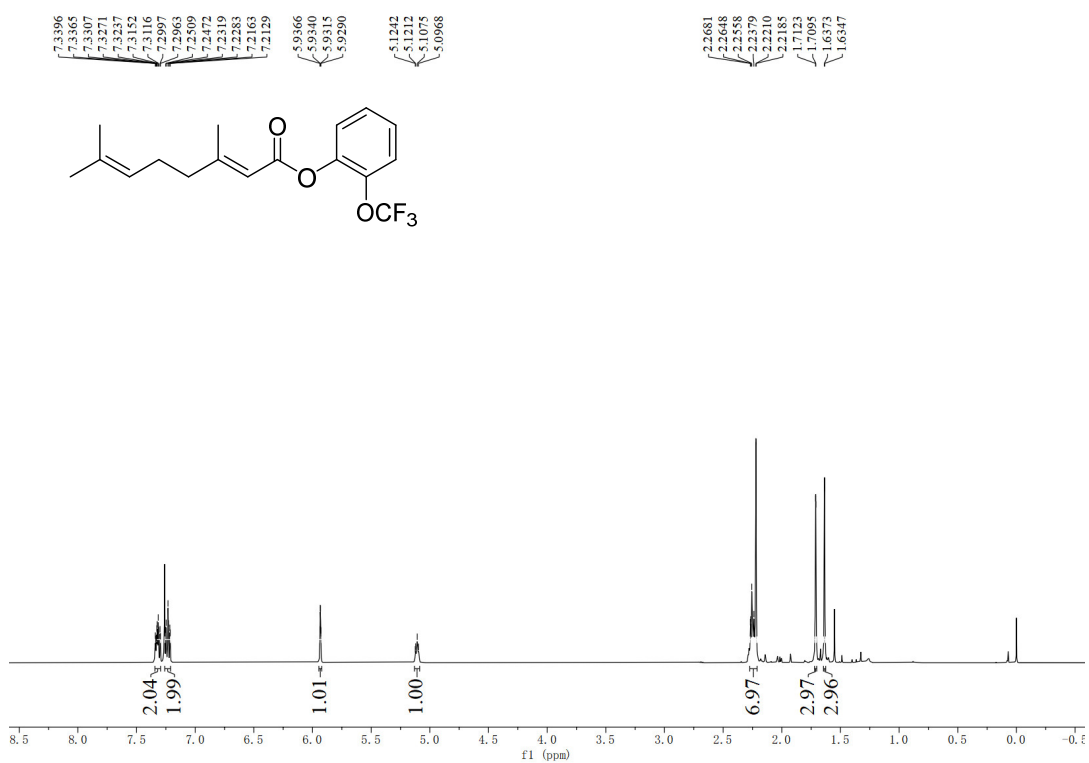

<sup>13</sup>C NMR of **5t**

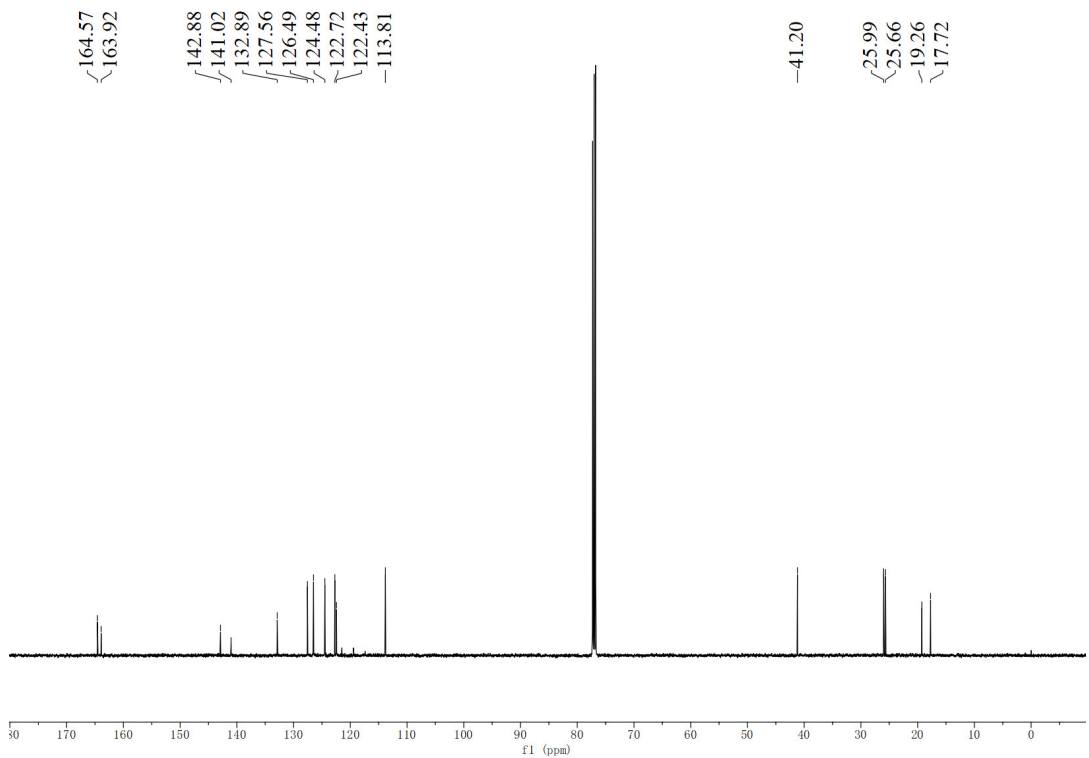

<sup>1</sup>H NMR of **5u**

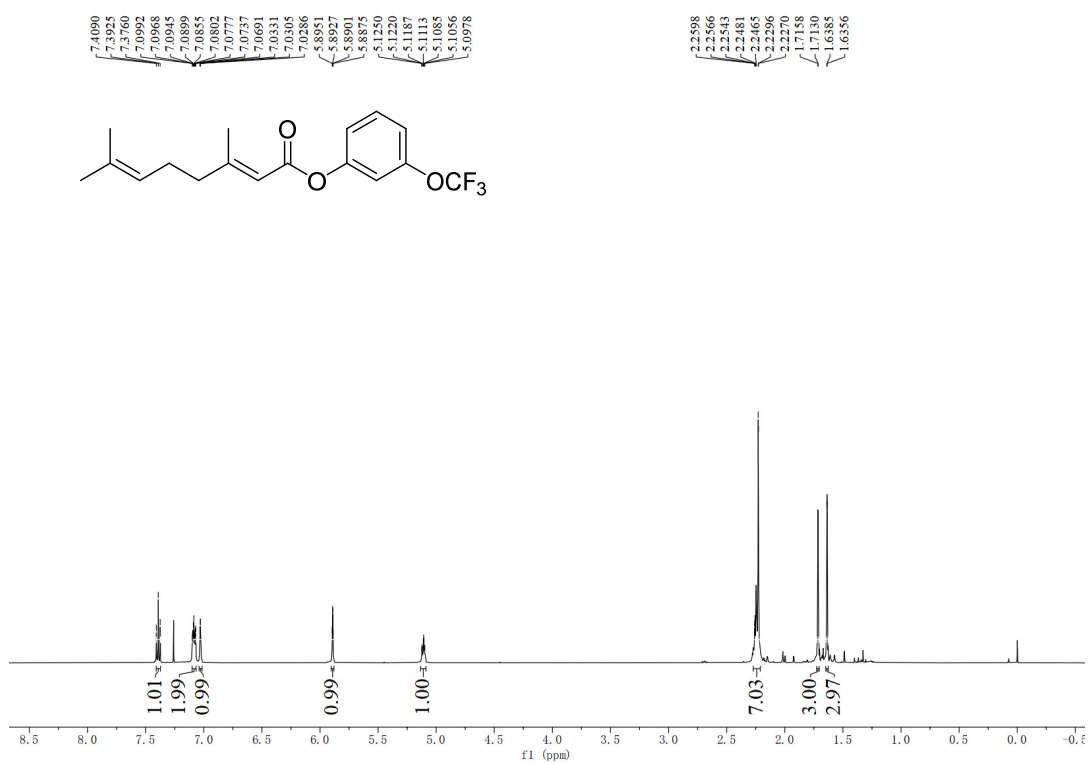

<sup>13</sup>C NMR of **5u**

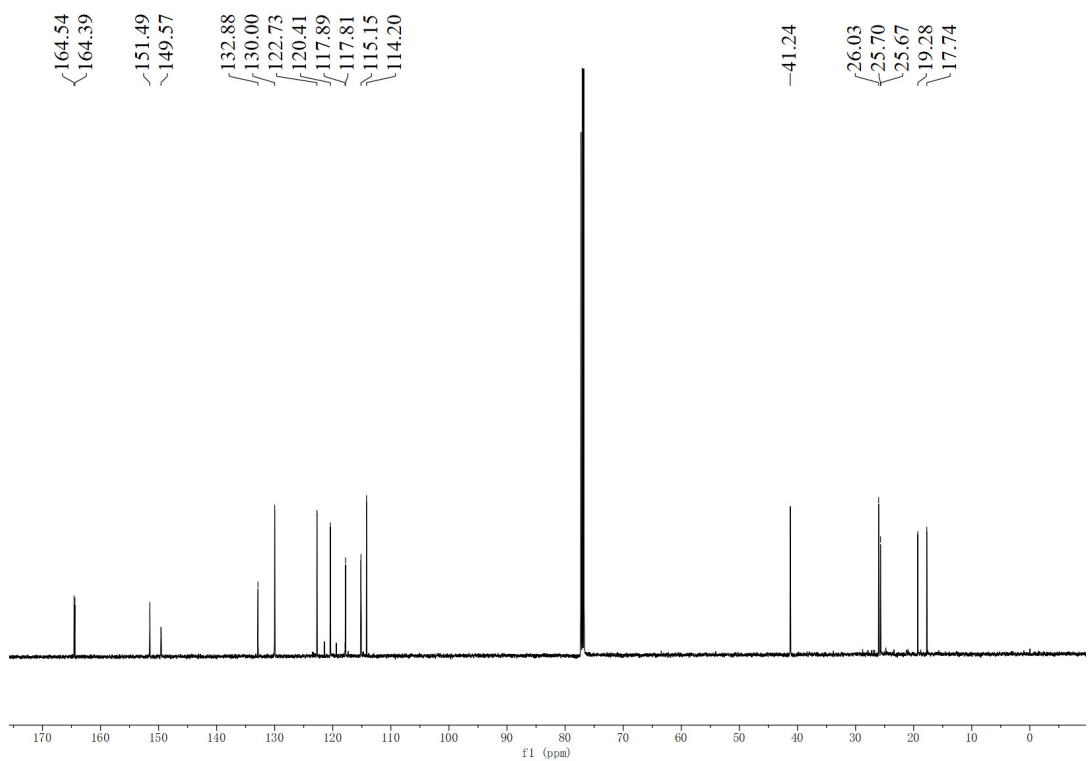

<sup>1</sup>H NMR of **5v**

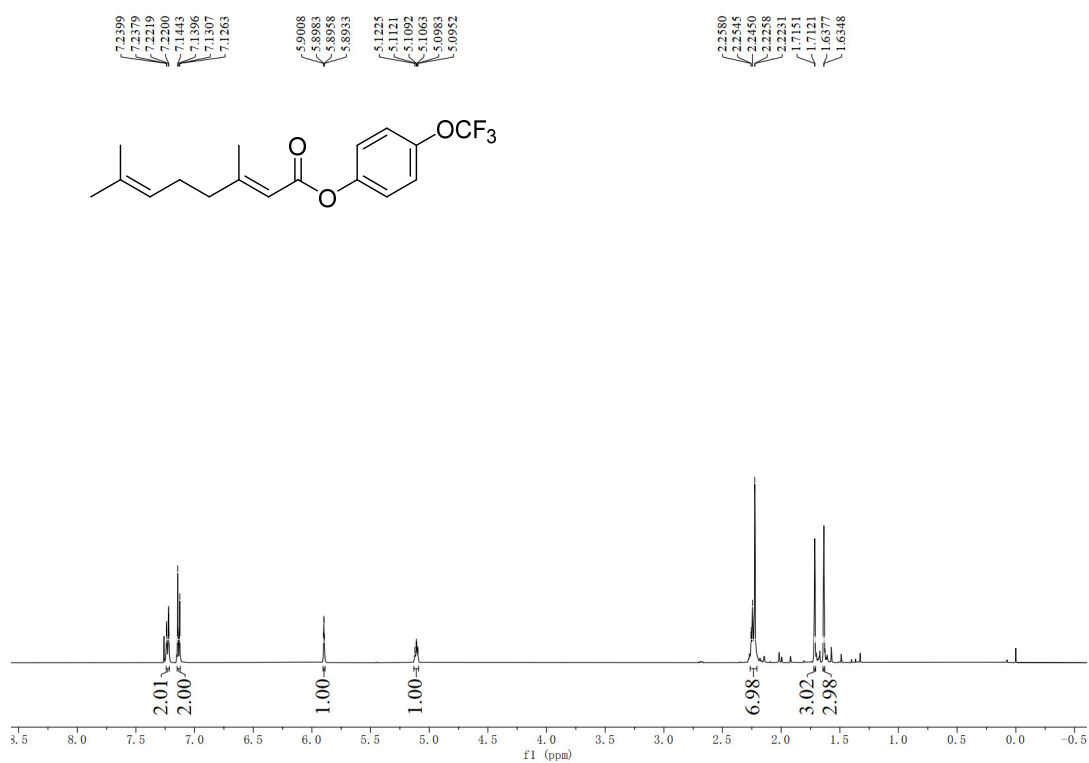

<sup>13</sup>C NMR of **5v**

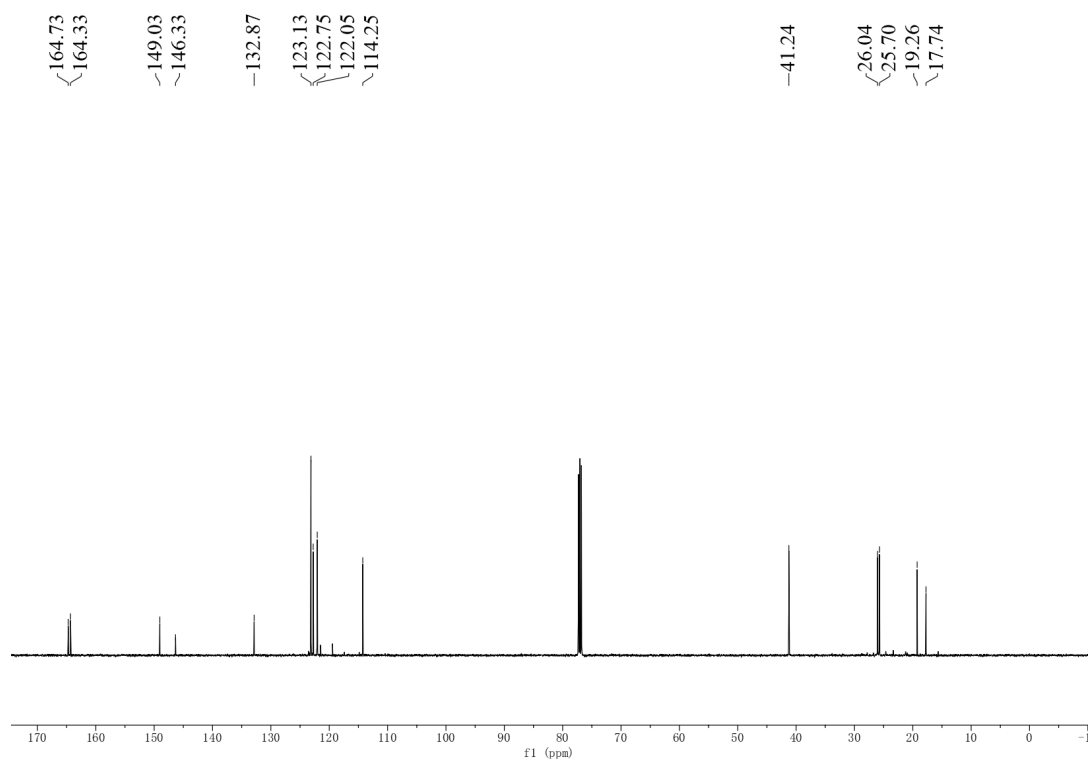

<sup>1</sup>H NMR of **5w**

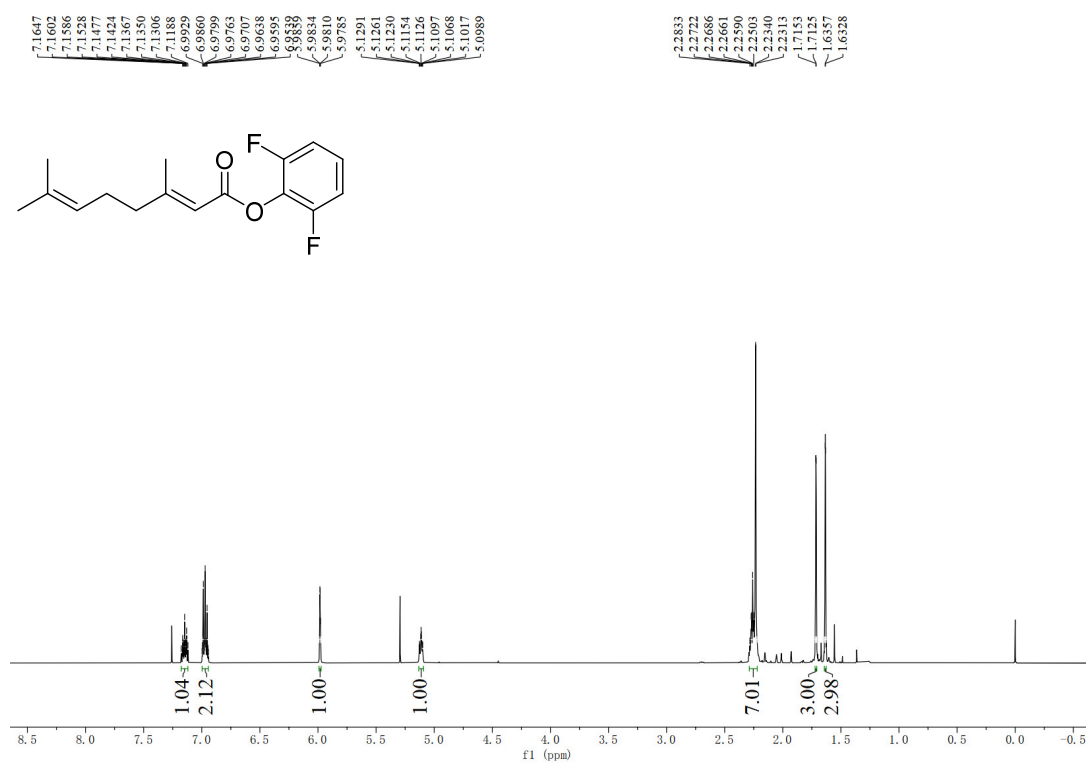

<sup>13</sup>C NMR of **5w**

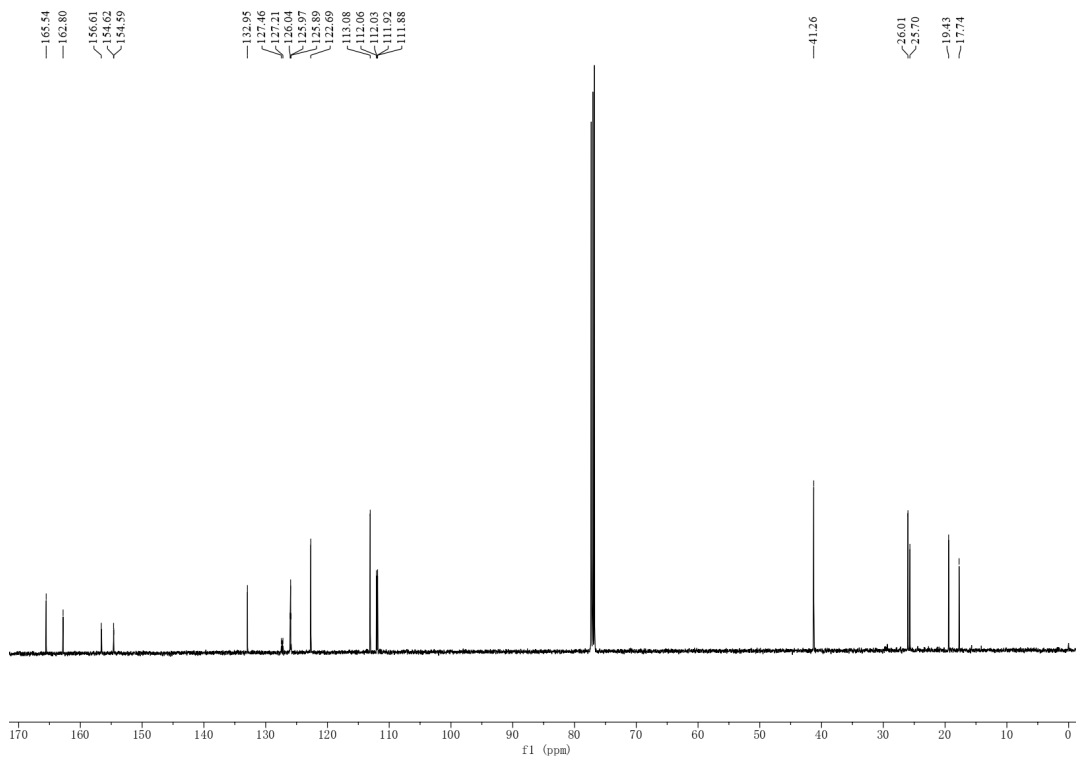

<sup>1</sup>H NMR of **5x**

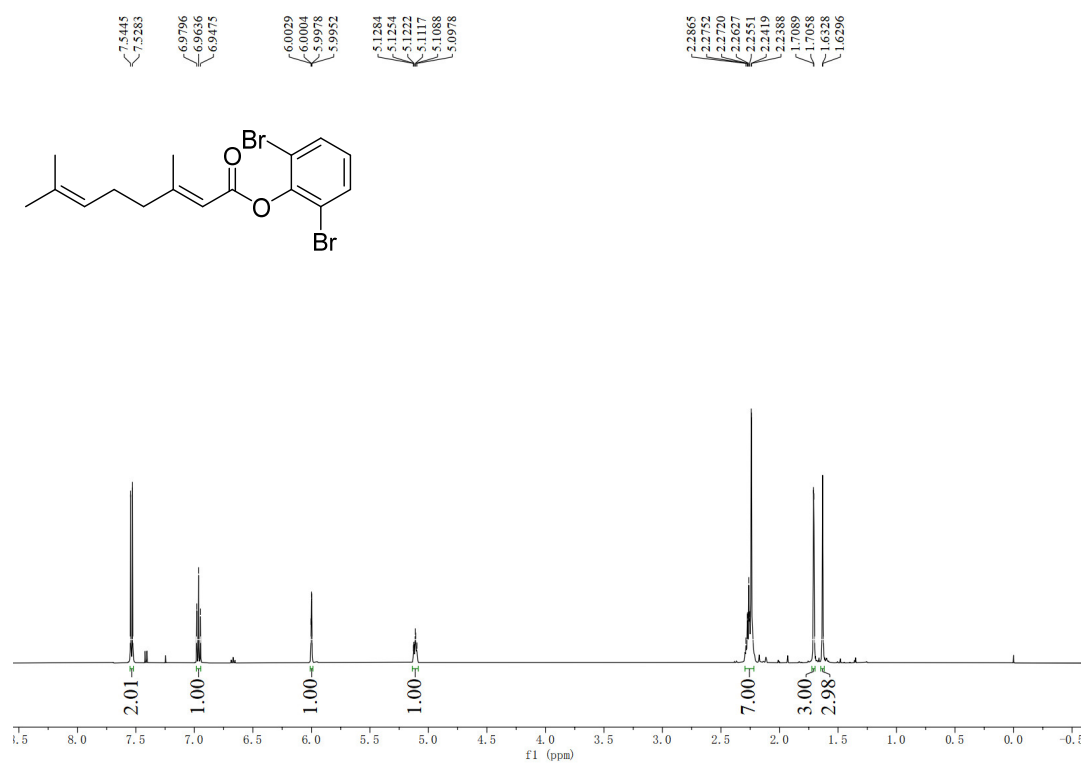

<sup>13</sup>C NMR of **5x**

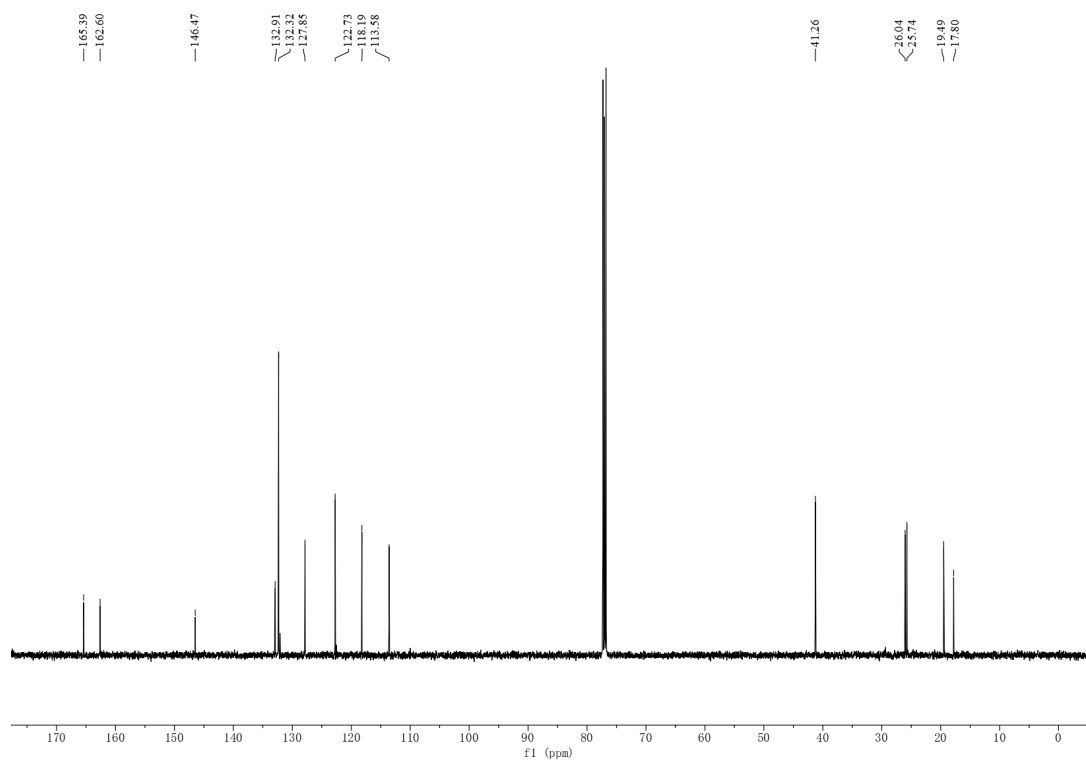

## 5. HRMS Spectrums of compounds **5a-5x**

### HRMS Spectrum of **5a**

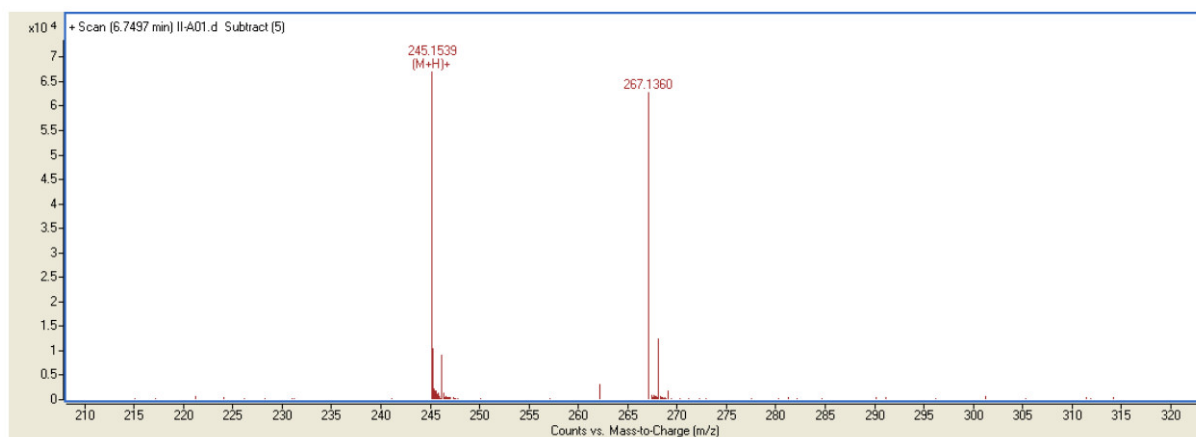

### HRMS Spectrum of **5b**

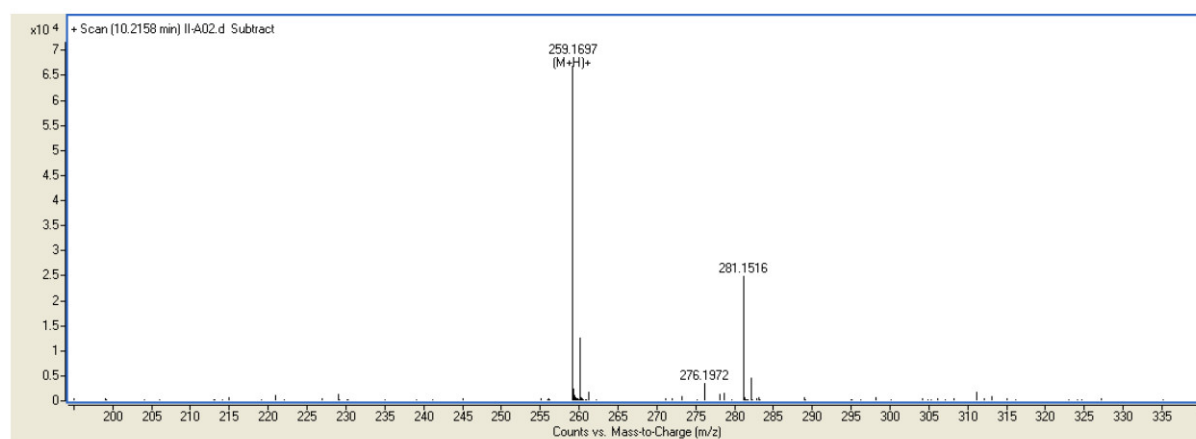

### HRMS Spectrum of **5c**

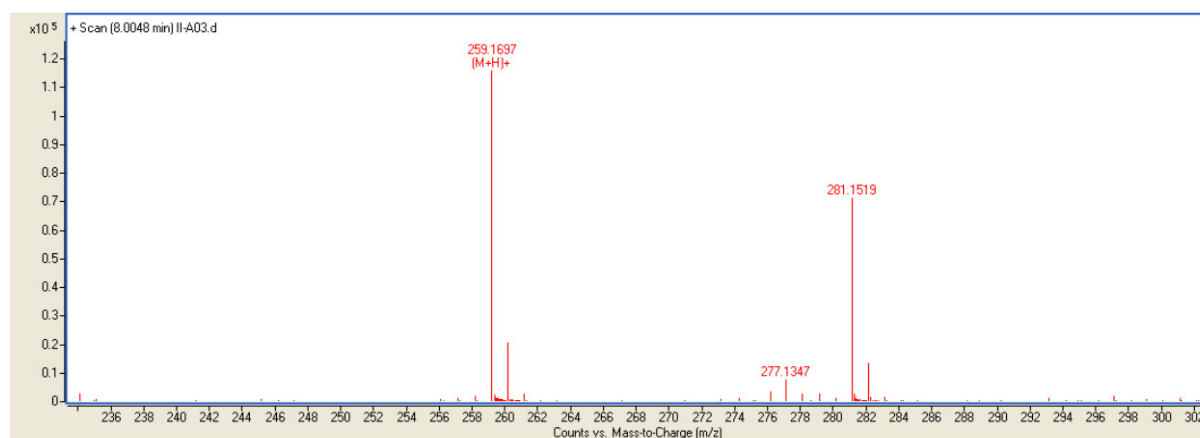

### HRMS Spectrum of **5d**

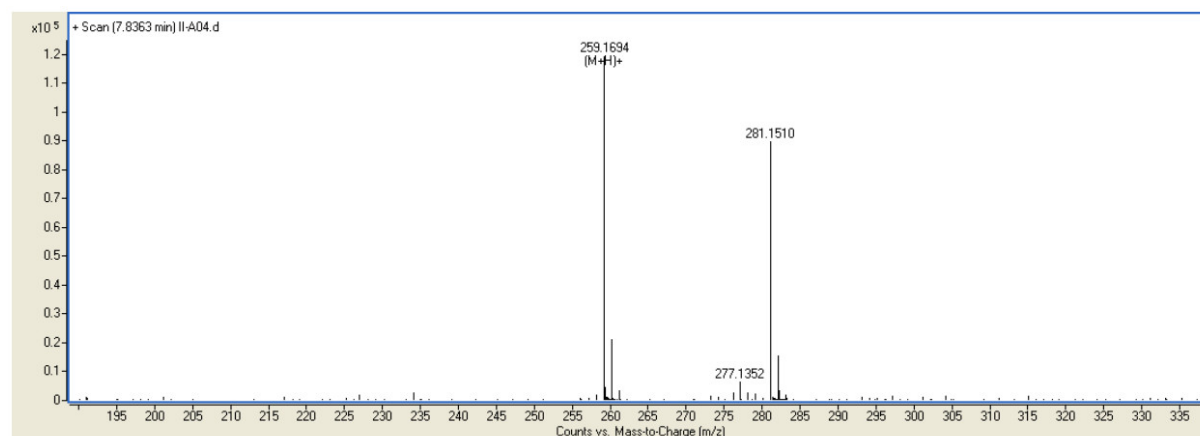

## HRMS Spectrum of **5e**

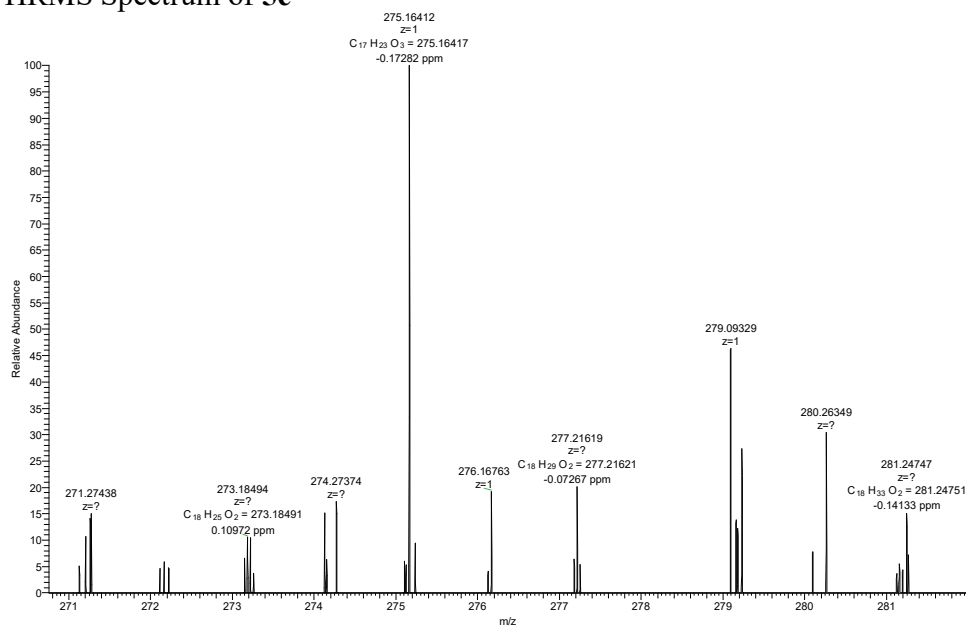

## HRMS Spectrum of **5f**

L-A06 #5 RT: 0.06 AV: 1 NL: 1.09E6  
T: FTMS (1,1) \* p APCI corona Full ms [100.00-1000.00]

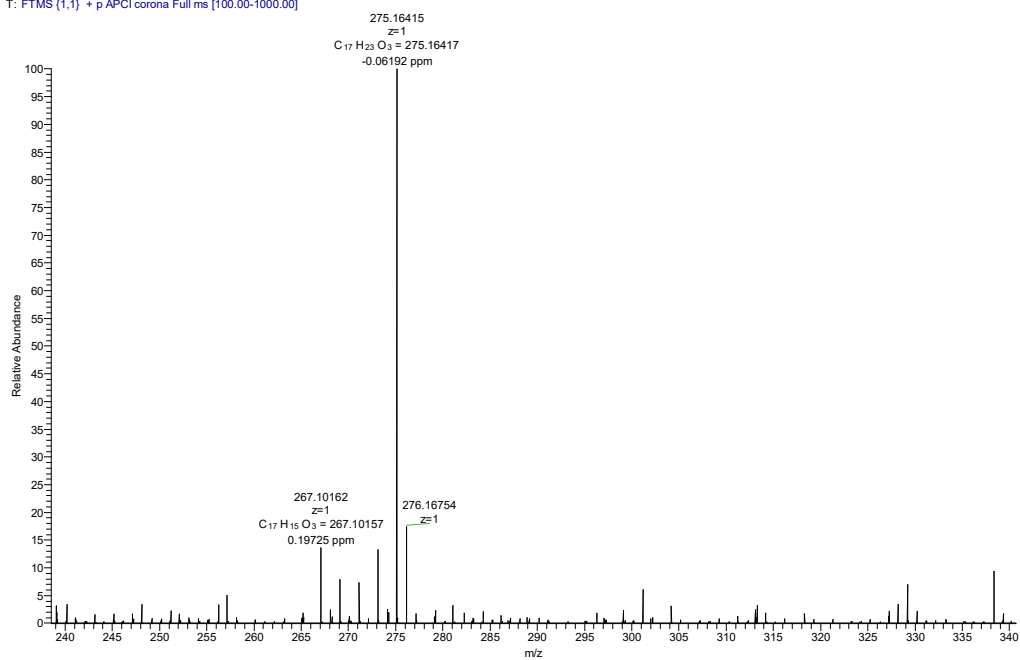



## HRMS Spectrum of **5g**

L-A07 #5 RT: 0.06 AV: 1 NL: 8.34E5  
T: FTMS (1,1) + p APCI corona Full ms [100.00-1000.00]

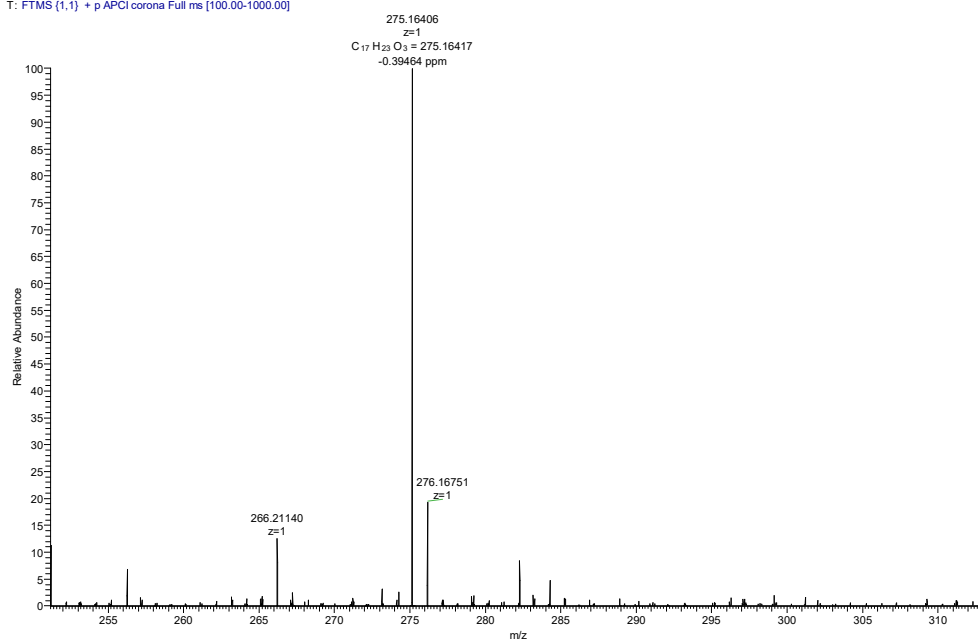

## HRMS Spectrum of **5h**

L-A08 #5 RT: 0.06 AV: 1 NL: 1.88E5  
T: FTMS (1,1) + p APCI corona Full ms [100.00-1000.00]

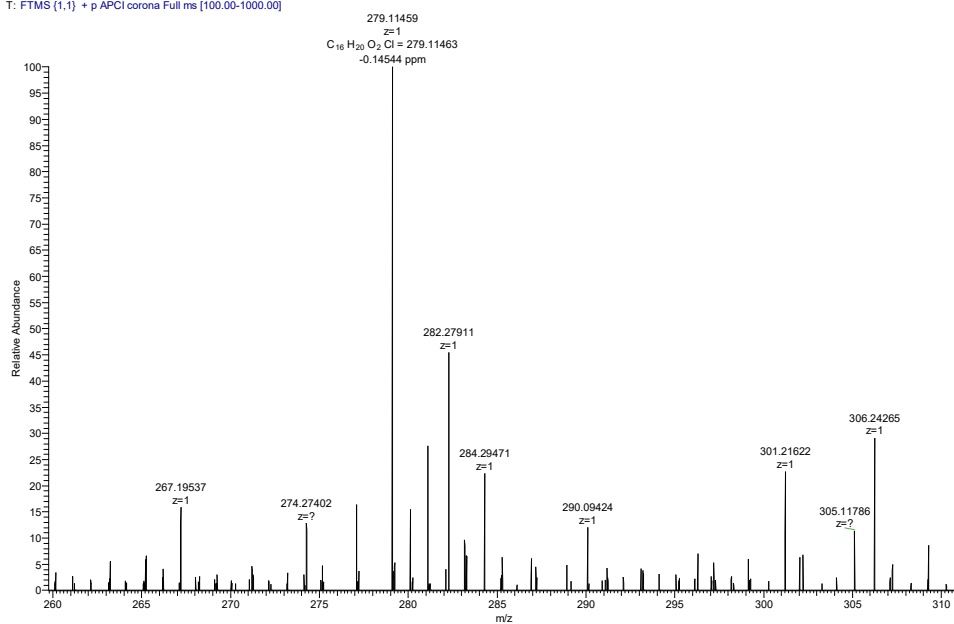

## HRMS Spectrum of 5i

LA09 #5 RT: 0.06 AV: 1 NL: 1.74E5  
T: FTMS (1,1) + p APCI corona Full ms [100.00-1000.00]

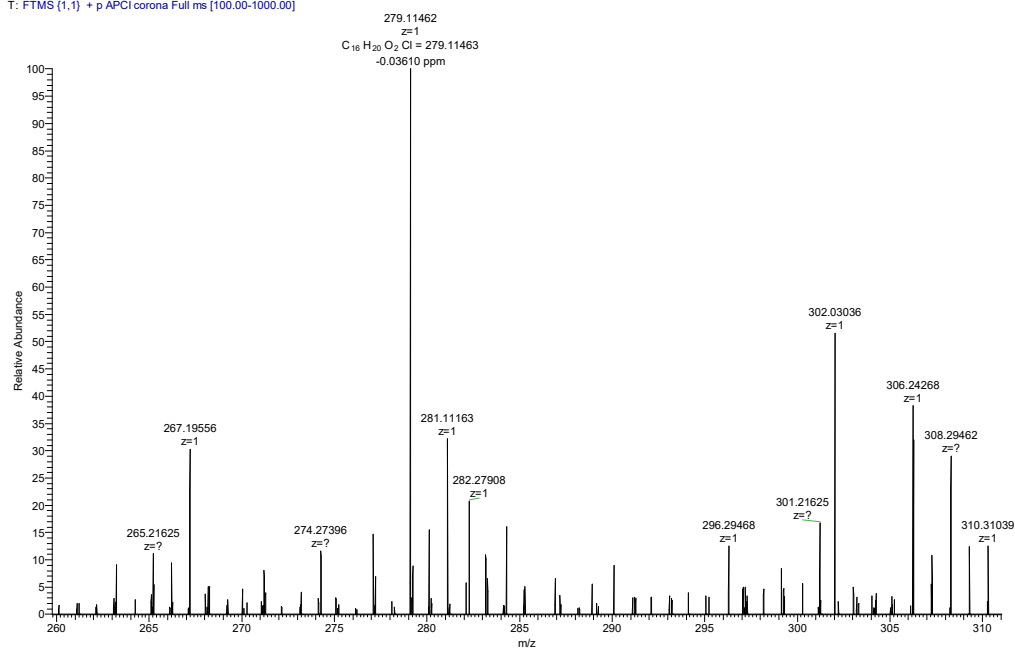

## HRMS Spectrum of 5j

LA10 #5 RT: 0.06 AV: 1 NL: 2.74E5  
T: FTMS (1,1) + p APCI corona Full ms [100.00-1000.00]

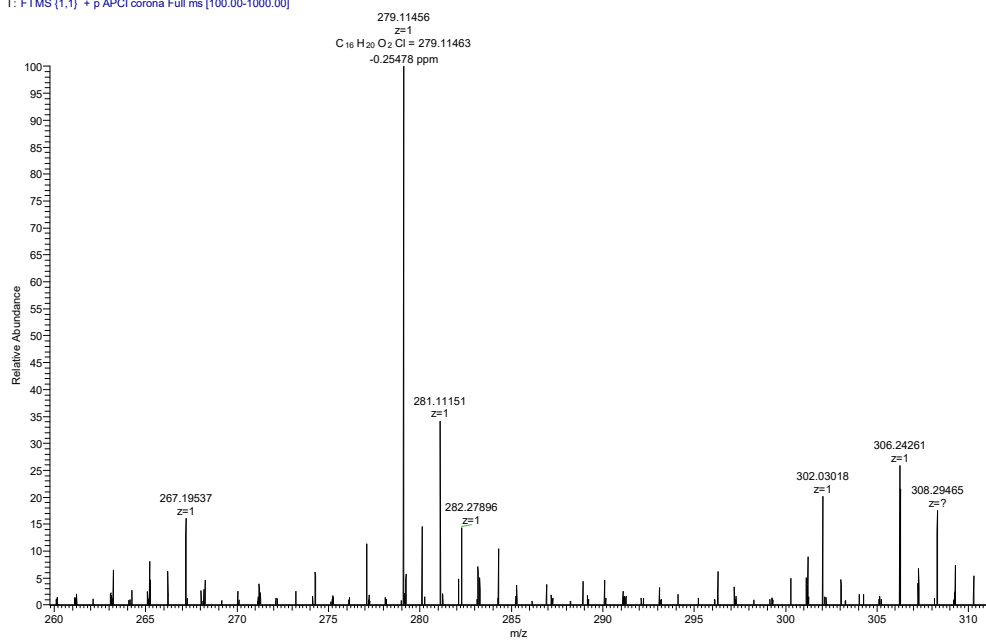

## HRMS Spectrum of **5k**

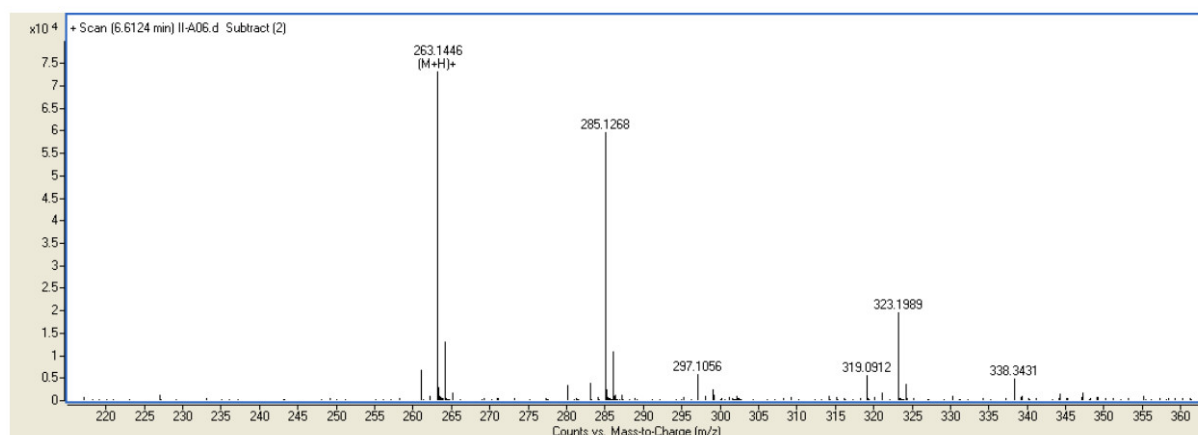

## HRMS Spectrum of **5l**

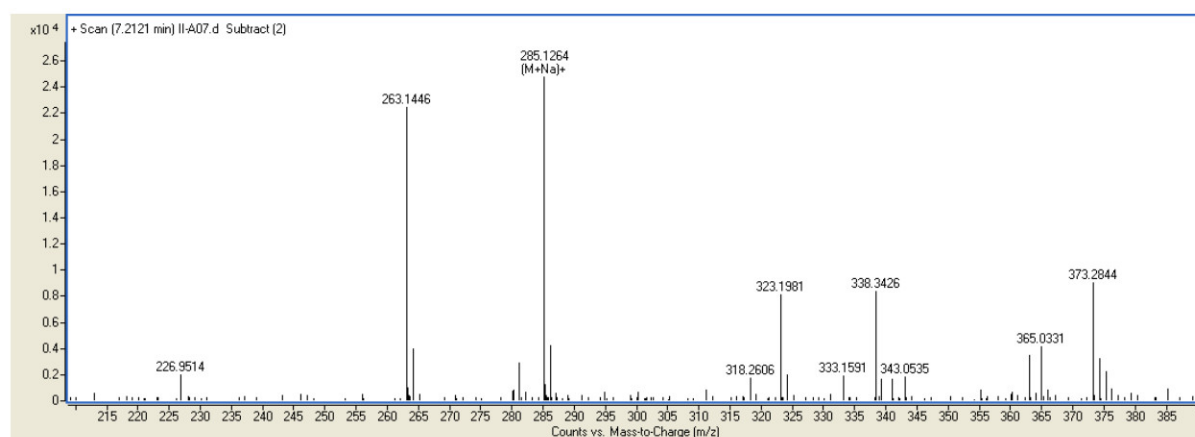

## HRMS Spectrum of **5m**

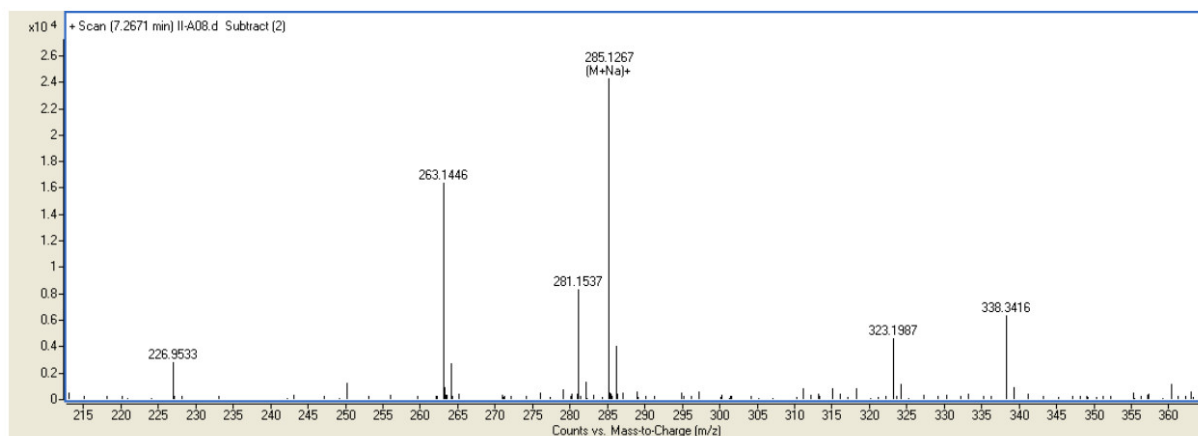

## HRMS Spectrum of **5n**

I-A14 #6 RT: 0.07 AV: 1 NL: 6.26E4  
T: FTMS (1.2) - p APCI corona Full ms [100.00-1000.00]

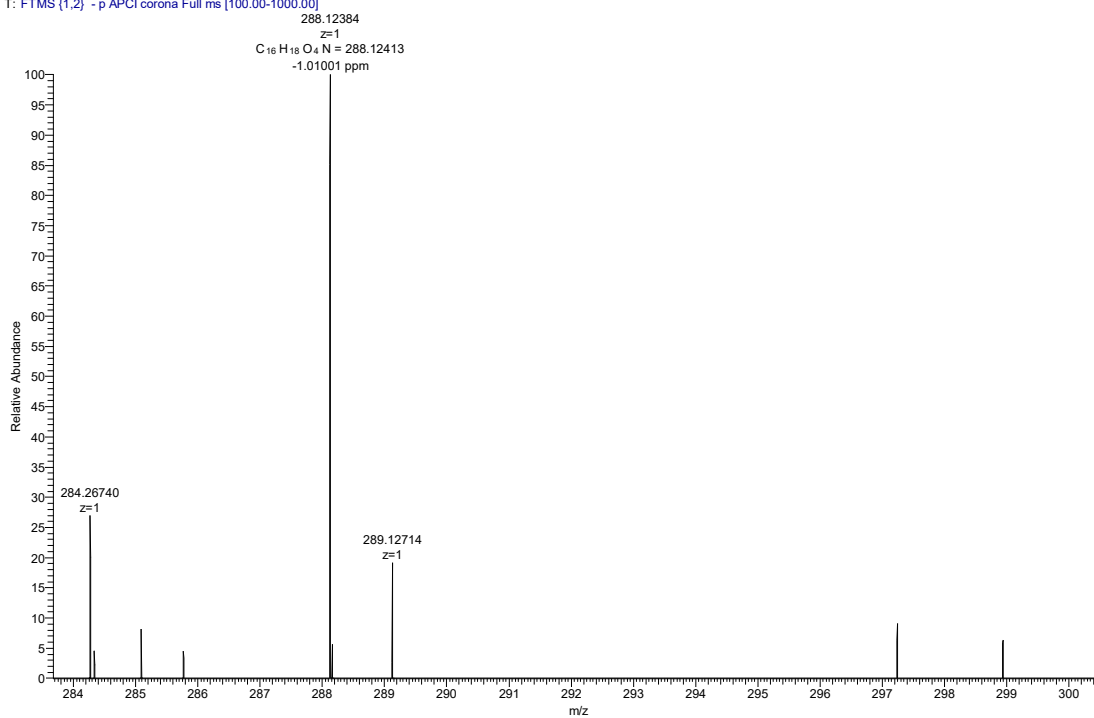

## HRMS Spectrum of **5o**

I-A15 #8 RT: 0.10 AV: 1 NL: 5.52E4  
T: FTMS (1,2) - p APCI corona Full ms [100.00-1000.00]

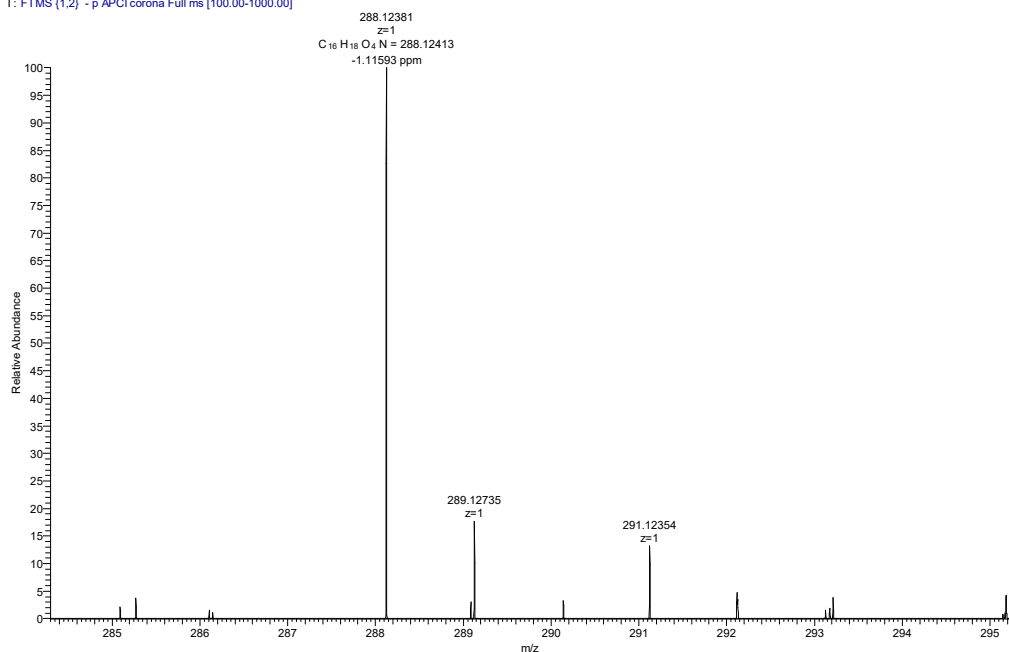

## HRMS Spectrum of **5p**

I-A16 #8 RT: 0.09 AV: 1 NL: 8.06E4  
T: FTMS (1,2) - p APCI corona Full ms [100.00-1000.00]

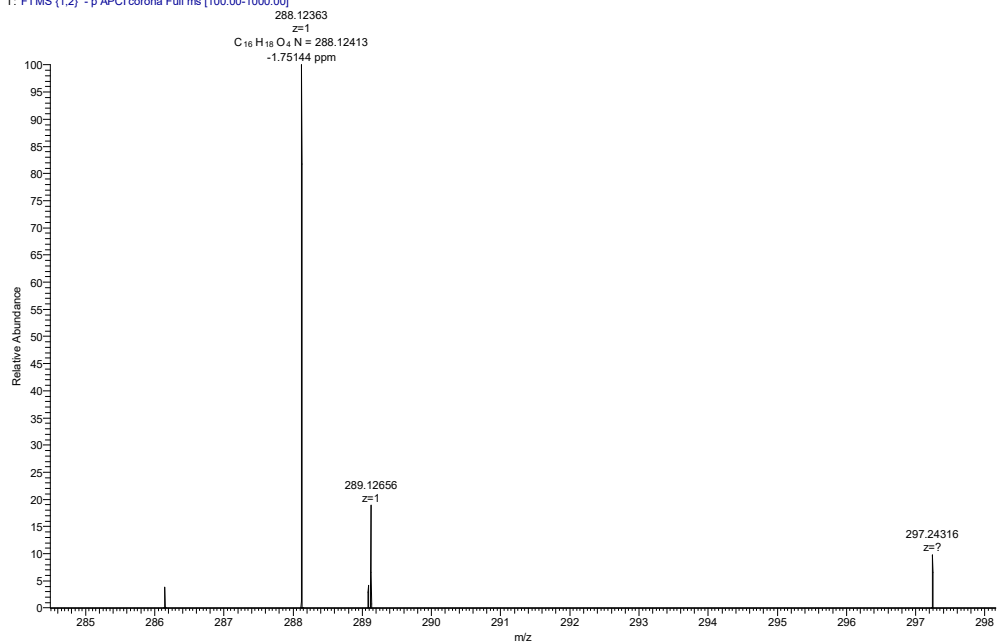

## HRMS Spectrum of **5q**

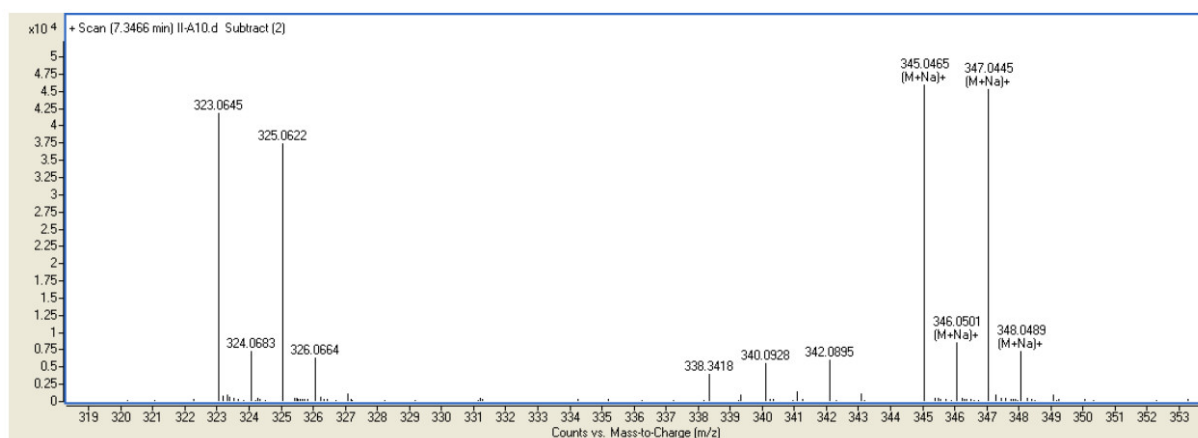

## HRMS Spectrum of **5r**

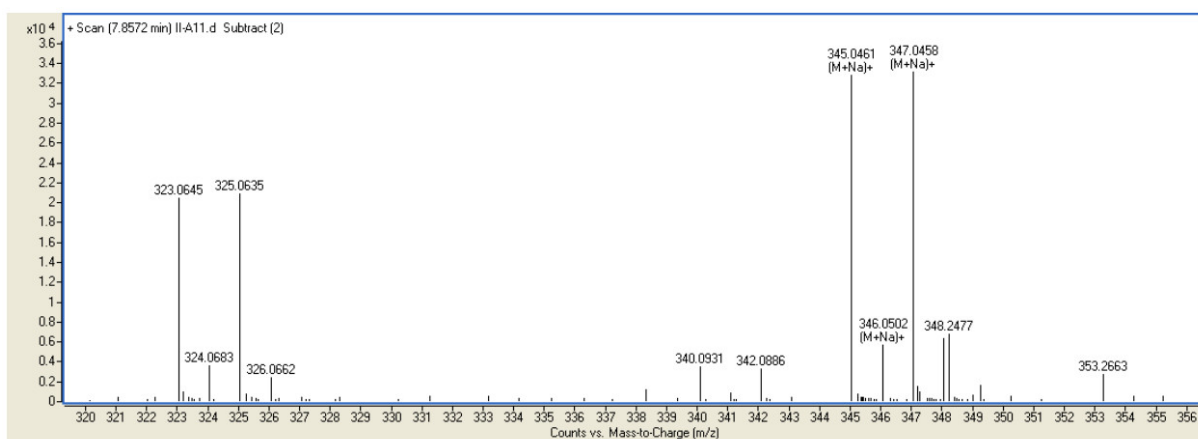

## HRMS Spectrum of **5s**

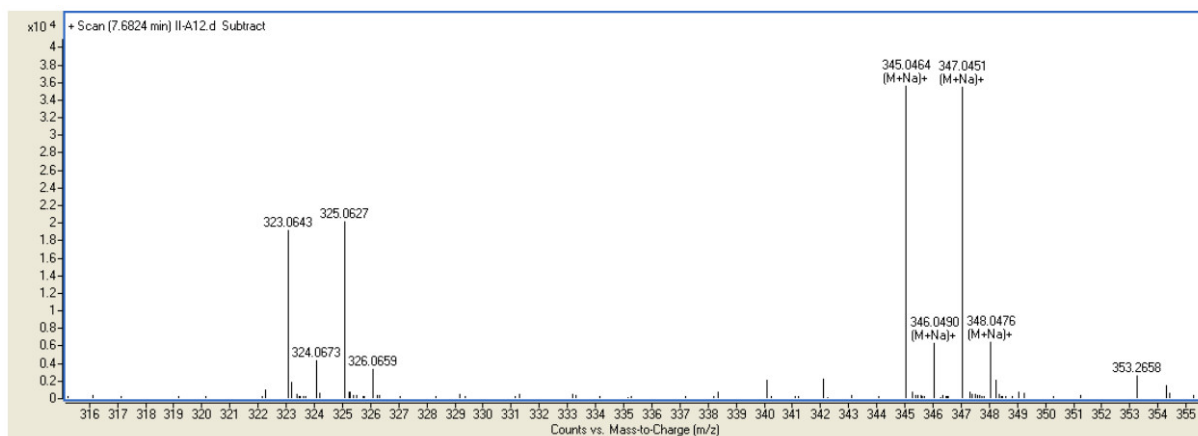

## HRMS Spectrum of **5t**

LA20 #6 RT: 0.07 AV: 1 NL: 5.49E4  
T: FTMS (1,2) - p APCI corona Full ms [100.00-1000.00]

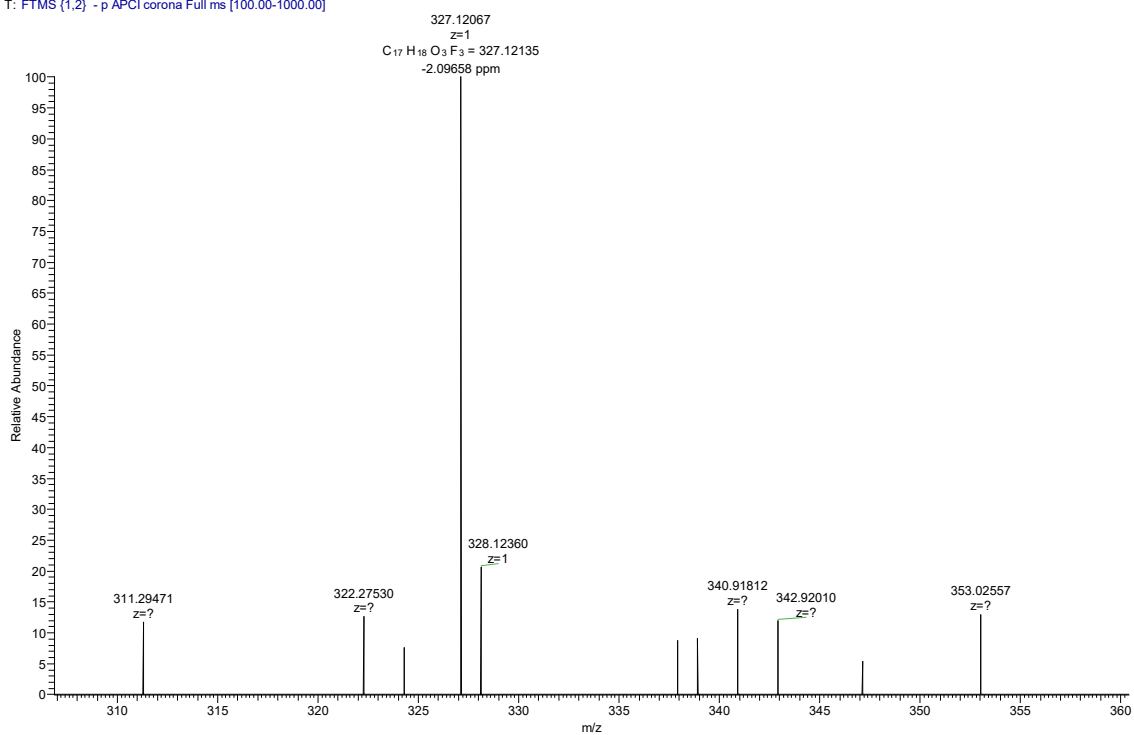

## HRMS Spectrum of **5u**

L-A21 #10 RT: 0.12 AV: 1 NL: 5.37E4  
T: FTMS (1,2) -p APCI corona Full ms [100.00-1000.00]

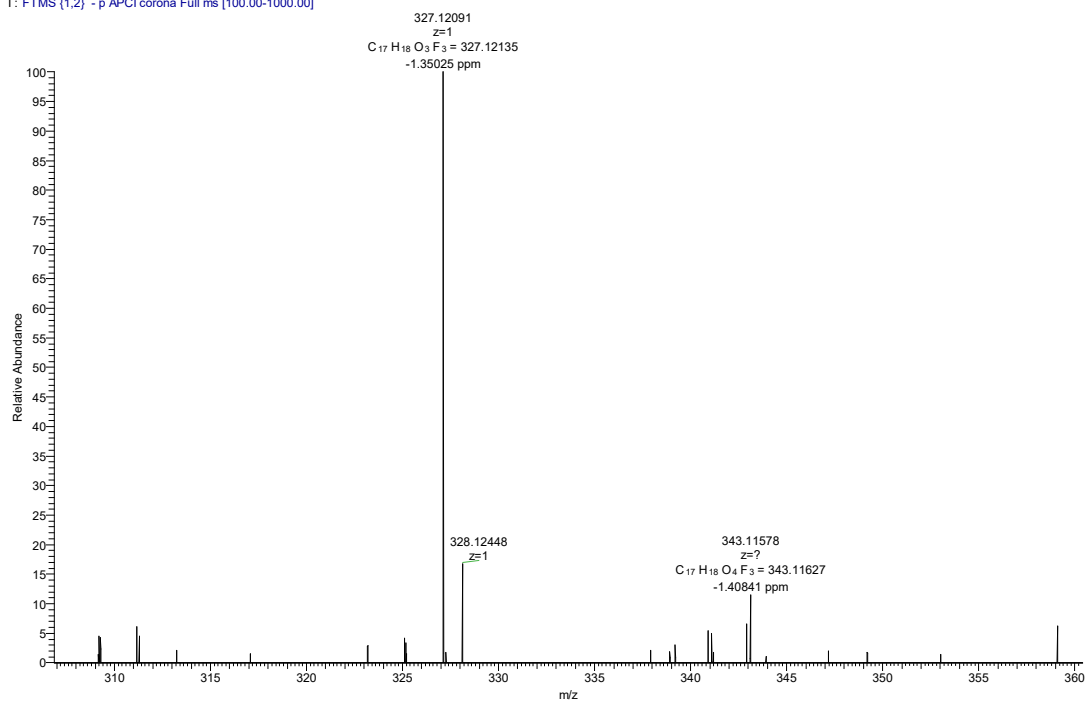

## HRMS Spectrum of **5v**

L-A22 #12 RT: 0.14 AV: 1 NL: 1.41E4  
T: FTMS (1,2) -p APCI corona Full ms [100.00-1000.00]

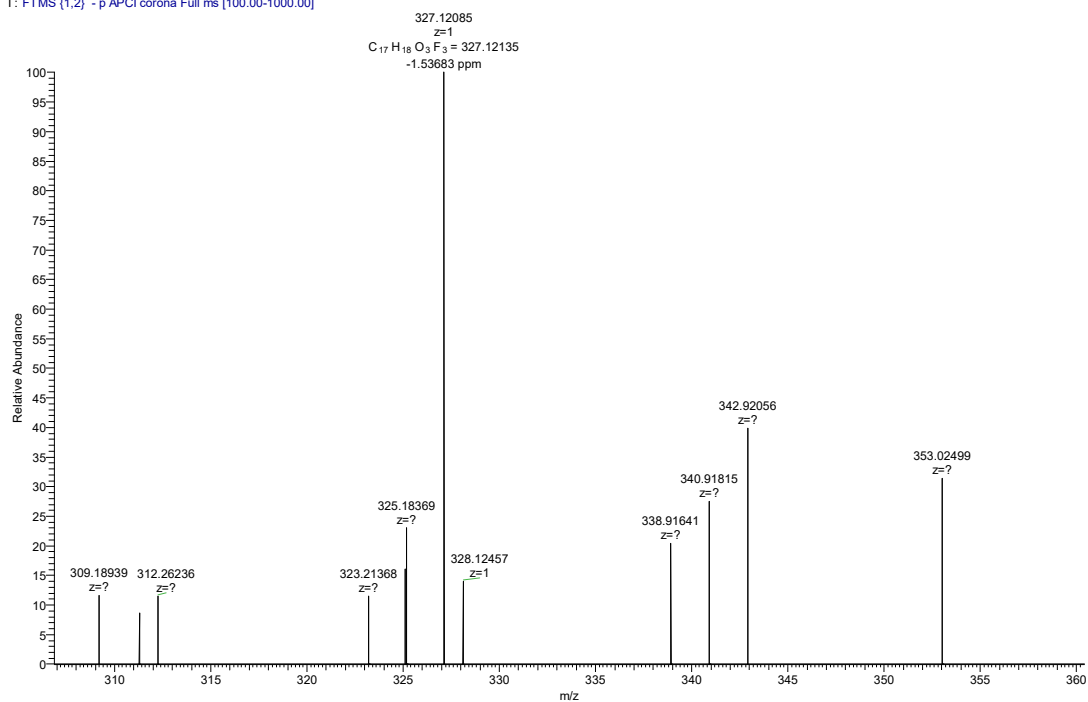



## HRMS Spectrum of **5w**

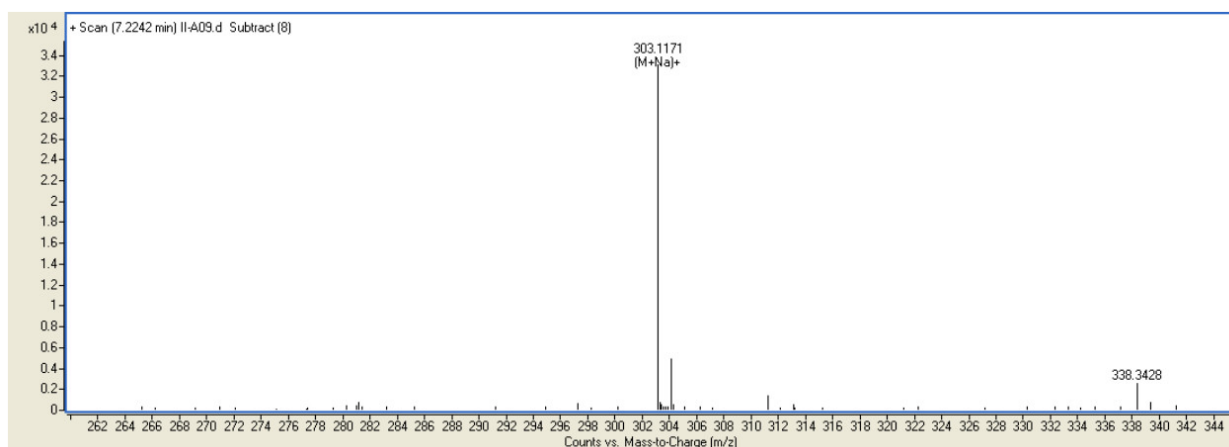

## HRMS Spectrum of **5x**

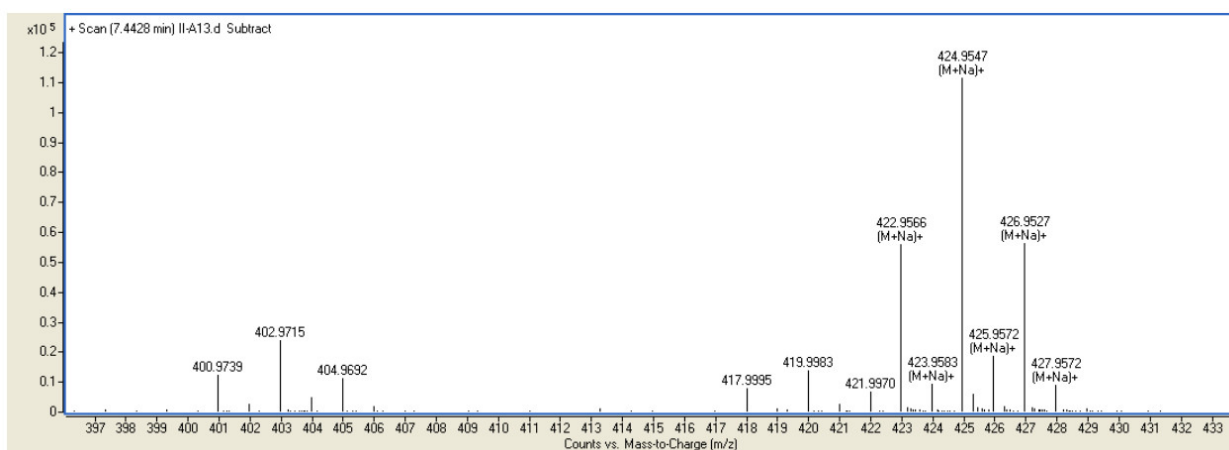

Supplement: s1 [file s1]
